# Supplementary material for: Overriding impaired FPR chemotaxis signaling in diabetic neutrophil stimulates infection control in murine diabetic wound
Source: eLife. 2022 Feb 3;11:e72071. doi: 10.7554/eLife.72071 (PMC8846594; doi:10.7554/eLife.72071)
Supplement: Figure 1—figure supplement 1—source data 1. [file elife-72071-fig1-figsupp1-data1.xlsx]

## Sheet: Fig. 1-S1
Figure 1-figure supplement 1
	C57_PBS_PA103				db/db_PBS_PA103
Day 1	17825.3	41551.2	17953.3	116009	8015695	9391240	1507538	2868555
Day 3	201238	104101	634441	112971	17021280	49627790	25773200	173611100
Day 6	4044.12	5830.9	11764.7	70422.5	1438849	72595280	26041670	8960573
Day 10	864.865	1500	1010.1	797.546	738007	412979	266498	21551720
Table Analyzed	Day 1				Table Analyzed	Day 3			Table Analyzed	Day 6		Table Analyzed	Day 10
Column A	C57B				Column A	C57B			Column A	C57B		Column A	C57B
vs.	vs.				vs.	vs.			vs.	vs.		vs.	vs.
Column B	db/db				Column B	db/db			Column B	db/db		Column B	db/db
Mann Whitney test					Mann Whitney test				Mann Whitney test			Mann Whitney test
P value	0.0286				P value	0.0286			P value	0.0286		P value	0.0286
Exact or approximate P value?	Exact				Exact or approximate P value?	Exact			Exact or approximate P value?	Exact		Exact or approximate P value?	Exact
P value summary	*				P value summary	*			P value summary	*		P value summary	*
Significantly different (P < 0.05)?	Yes				Significantly different (P < 0.05)?	Yes			Significantly different (P < 0.05)?	Yes		Significantly different (P < 0.05)?	Yes
One- or two-tailed P value?	Two-tailed				One- or two-tailed P value?	Two-tailed			One- or two-tailed P value?	Two-tailed		One- or two-tailed P value?	Two-tailed
Sum of ranks in column A,B	10 , 26				Sum of ranks in column A,B	10 , 26			Sum of ranks in column A,B	10 , 26		Sum of ranks in column A,B	10 , 26
Mann-Whitney U	0				Mann-Whitney U	0			Mann-Whitney U	0		Mann-Whitney U	0
Difference between medians					Difference between medians				Difference between medians			Difference between medians
Median of column A	29752, n=4				Median of column A	157105, n=4			Median of column A	8798, n=4		Median of column A	937.5, n=4
Median of column B	5442125, n=4				Median of column B	37700495, n=4			Median of column B	17501122, n=4		Median of column B	575493, n=4
Difference: Actual	-5412373				Difference: Actual	-37543390			Difference: Actual	-17492324		Difference: Actual	-574556
Difference: Hodges-Lehmann	-5375208				Difference: Hodges-Lehmann	-37331224			Difference: Hodges-Lehmann	-17463888		Difference: Hodges-Lehmann	-574345
