# Supplementary material for: Overriding impaired FPR chemotaxis signaling in diabetic neutrophil stimulates infection control in murine diabetic wound
Source: eLife. 2022 Feb 3;11:e72071. doi: 10.7554/eLife.72071 (PMC8846594; doi:10.7554/eLife.72071)
Supplement: Figure 1—source data 1. [file elife-72071-fig1-data1.xlsx]

## Sheet: Fig. 1b
Fig. 1b	Neutrophils counts
Day 1_C57	Day 1 db/db	Day 3 C57	Day 3 db/db	Day 6 C57	Day 6 db/db	Day 10 C57	Day 10 db/db
112.125	5.75	165.25	14.5	37.5	118.75	20	211.25
113.2	9.5	209.25	22	37	138.5	37	230.25
132.25	8.25	187.5	12.25	42.25	146.75	28	158
83.1667	8.75	213.75	10.25	45.25	82.5	30.75	80
Table Analyzed
Column B	Day 1 db/db			Column D	Day 3 db/db			Column F	Day 6 db/db			Column H	Day 10 db/db			Column C	Day 3 C57			Column E	Day 6 C57			Column G	Day 10 C57			Column D	Day 3 db/db			Column F	Day 6 db/db			Column H	Day 10 db/db
vs.	vs.			vs.	vs.			vs.	vs.			vs.	vs.			vs.	vs.			vs.	vs.			vs.	vs.			vs.	vs.			vs.	vs.			vs.	vs.
Column A	Day 1_C57			Column C	Day 3 C57			Column E	Day 6 C57			Column G	Day 10 C57			Column A	Day 1_C57			Column A	Day 1_C57			Column A	Day 1_C57			Column B	Day 1 db/db			Column B	Day 1 db/db			Column B	Day 1 db/db
Unpaired t test				Unpaired t test				Unpaired t test				Unpaired t test				Unpaired t test				Unpaired t test				Unpaired t test				Unpaired t test				Unpaired t test				Unpaired t test
P value	<0.0001			P value	<0.0001			P value	0.0014			P value	0.0059			P value	0.0014			P value	0.0005			P value	0.0003			P value	0.0476			P value	0.0002			P value	0.003
P value summary	****			P value summary	****			P value summary	**			P value summary	**			P value summary	**			P value summary	***			P value summary	***			P value summary	*			P value summary	***			P value summary	**
Significantly different (P < 0.05)?	Yes			Significantly different (P < 0.05)?	Yes			Significantly different (P < 0.05)?	Yes			Significantly different (P < 0.05)?	Yes			Significantly different (P < 0.05)?	Yes			Significantly different (P < 0.05)?	Yes			Significantly different (P < 0.05)?	Yes			Significantly different (P < 0.05)?	Yes			Significantly different (P < 0.05)?	Yes			Significantly different (P < 0.05)?	Yes
One- or two-tailed P value?	Two-tailed			One- or two-tailed P value?	Two-tailed			One- or two-tailed P value?	Two-tailed			One- or two-tailed P value?	Two-tailed			One- or two-tailed P value?	Two-tailed			One- or two-tailed P value?	Two-tailed			One- or two-tailed P value?	Two-tailed			One- or two-tailed P value?	Two-tailed			One- or two-tailed P value?	Two-tailed			One- or two-tailed P value?	Two-tailed
t, df	t=10.06, df=6			t, df	t=15.66, df=6			t, df	t=5.618, df=6			t, df	t=4.167, df=6			t, df	t=5.562, df=6			t, df	t=6.756, df=6			t, df	t=7.580, df=6			t, df	t=2.483, df=6			t, df	t=7.927, df=6			t, df	t=4.809, df=6
How big is the difference?				How big is the difference?				How big is the difference?				How big is the difference?				How big is the difference?				How big is the difference?				How big is the difference?				How big is the difference?				How big is the difference?				How big is the difference?
Mean of column A	110.2			Mean of column C	193.9			Mean of column E	40.5			Mean of column G	28.94			Mean of column A	110.2			Mean of column A	110.2			Mean of column A	110.2			Mean of column B	8.063			Mean of column B	8.063			Mean of column B	8.063
Mean of column B	8.063			Mean of column D	14.75			Mean of column F	121.6			Mean of column H	169.9			Mean of column C	193.9			Mean of column E	40.5			Mean of column G	28.94			Mean of column D	14.75			Mean of column F	121.6			Mean of column H	169.9
Difference between means (B - A) ± SEM	-102.1 ± 10.16			Difference between means (D - C) ± SEM	-179.2 ± 11.44			Difference between means (F - E) ± SEM	81.13 ± 14.44			Difference between means (H - G) ± SEM	140.9 ± 33.82			Difference between means (C - A) ± SEM	83.75 ± 15.06			Difference between means (E - A) ± SEM	-69.69 ± 10.31			Difference between means (G - A) ± SEM	-81.25 ± 10.72			Difference between means (D - B) ± SEM	6.688 ± 2.693			Difference between means (F - B) ± SEM	113.6 ± 14.33			Difference between means (H - B) ± SEM	161.8 ± 33.64
95% confidence interval	-127.0 to -77.27			95% confidence interval	-207.2 to -151.2			95% confidence interval	45.79 to 116.5			95% confidence interval	58.19 to 223.7			95% confidence interval	46.91 to 120.6			95% confidence interval	-94.92 to -44.45			95% confidence interval	-107.5 to -55.02			95% confidence interval	0.09721 to 13.28			95% confidence interval	78.51 to 148.6			95% confidence interval	79.49 to 244.1
R squared (eta squared)	0.944			R squared (eta squared)	0.9761			R squared (eta squared)	0.8403			R squared (eta squared)	0.7432			R squared (eta squared)	0.8375			R squared (eta squared)	0.8838			R squared (eta squared)	0.9054			R squared (eta squared)	0.5068			R squared (eta squared)	0.9128			R squared (eta squared)	0.794
F test to compare variances				F test to compare variances				F test to compare variances				F test to compare variances				F test to compare variances				F test to compare variances				F test to compare variances				F test to compare variances				F test to compare variances				F test to compare variances
F, DFn, Dfd	155.2, 3, 3			F, DFn, Dfd	18.85, 3, 3			F, DFn, Dfd	52.37, 3, 3			F, DFn, Dfd	91.08, 3, 3			F, DFn, Dfd	1.213, 3, 3			F, DFn, Dfd	26.23, 3, 3			F, DFn, Dfd	8.250, 3, 3			F, DFn, Dfd	9.988, 3, 3			F, DFn, Dfd	309.9, 3, 3			F, DFn, Dfd	1714, 3, 3
P value	0.0017			P value	0.0378			P value	0.0087			P value	0.0038			P value	0.8777			P value	0.0236			P value	0.1167			P value	0.0906			P value	0.0006			P value	<0.0001
P value summary	**			P value summary	*			P value summary	**			P value summary	**			P value summary	ns			P value summary	*			P value summary	ns			P value summary	ns			P value summary	***			P value summary	****
Significantly different (P < 0.05)?	Yes			Significantly different (P < 0.05)?	Yes			Significantly different (P < 0.05)?	Yes			Significantly different (P < 0.05)?	Yes			Significantly different (P < 0.05)?	No			Significantly different (P < 0.05)?	Yes			Significantly different (P < 0.05)?	No			Significantly different (P < 0.05)?	No			Significantly different (P < 0.05)?	Yes			Significantly different (P < 0.05)?	Yes
Data analyzed				Data analyzed				Data analyzed				Data analyzed				Data analyzed				Data analyzed				Data analyzed				Data analyzed				Data analyzed				Data analyzed
Sample size, column A	4			Sample size, column C	4			Sample size, column E	4			Sample size, column G	4			Sample size, column A	4			Sample size, column A	4			Sample size, column A	4			Sample size, column B	4			Sample size, column B	4			Sample size, column B	4
Sample size, column B	4			Sample size, column D	4			Sample size, column F	4			Sample size, column H	4			Sample size, column C	4			Sample size, column E	4			Sample size, column G	4			Sample size, column D	4			Sample size, column F	4			Sample size, column H	4
