# Supplementary material for: Overriding impaired FPR chemotaxis signaling in diabetic neutrophil stimulates infection control in murine diabetic wound
Source: eLife. 2022 Feb 3;11:e72071. doi: 10.7554/eLife.72071 (PMC8846594; doi:10.7554/eLife.72071)
Supplement: Figure 1—source data 2. [file elife-72071-fig1-data2.xlsx]

## Sheet: Fig. 1c
	Fig. 1c	MPO
	Day 1_C57	Day 1 db/db	Day 3 C57	Day 3 db/db	Day 6 C57	Day 6 db/db	Day 10 C57	Day 10 db/db
	21.28	4.673	28.02	13.75	21.18	37.95	15.6	28.05
	24.98	4.595	33.52	13.7	28.84	42.38	18.57	48.53
	23.9	4.673	34.18	18.69	26.38	26.18	18.478	72.56
	22.34	4.439	40.12	22.06	25.68	25.8	18.938	43.96
	Column B	Day 1 dbdb			Column D	Day 3 dbdb			Column F	Day 6 dbdb			Column H	Day 10 dbdb			Column C	Day 3 C57			Column E	Day 6 C57			Column G	Day 10 C57			Column D	Day 3 dbdb			Column F	Day 6 dbdb			Column H	Day 10 dbdb
	vs.	vs.			vs.	vs.			vs.	vs.			vs.	vs.			vs.	vs.			vs.	vs.			vs.	vs.			vs.	vs.			vs.	vs.			vs.	vs.
	Column A	Day 1_C57			Column C	Day 3 C57			Column E	Day 6 C57			Column G	Day 10 C57			Column A	Day 1_C57			Column A	Day 1_C57			Column A	Day 1_C57			Column B	Day 1 dbdb			Column B	Day 1 dbdb			Column B	Day 1 dbdb
	Unpaired t test				Unpaired t test				Unpaired t test				Unpaired t test				Unpaired t test				Unpaired t test				Unpaired t test				Unpaired t test				Unpaired t test				Unpaired t test
	P value	<0.0001			P value	0.0019			P value	0.143			P value	0.0167			P value	0.006			P value	0.2306			P value	0.0035			P value	0.0009			P value	0.0005			P value	0.0032
	P value summary	****			P value summary	**			P value summary	ns			P value summary	*			P value summary	**			P value summary	ns			P value summary	**			P value summary	***			P value summary	***			P value summary	**
	Significantly different (P < 0.05)?	Yes			Significantly different (P < 0.05)?	Yes			Significantly different (P < 0.05)?	No			Significantly different (P < 0.05)?	Yes			Significantly different (P < 0.05)?	Yes			Significantly different (P < 0.05)?	No			Significantly different (P < 0.05)?	Yes			Significantly different (P < 0.05)?	Yes			Significantly different (P < 0.05)?	Yes			Significantly different (P < 0.05)?	Yes
	One- or two-tailed P value?	Two-tailed			One- or two-tailed P value?	Two-tailed			One- or two-tailed P value?	Two-tailed			One- or two-tailed P value?	Two-tailed			One- or two-tailed P value?	Two-tailed			One- or two-tailed P value?	Two-tailed			One- or two-tailed P value?	Two-tailed			One- or two-tailed P value?	Two-tailed			One- or two-tailed P value?	Two-tailed			One- or two-tailed P value?	Two-tailed
	t, df	t=22.56, df=6			t, df	t=5.274, df=6			t, df	t=1.685, df=6			t, df	t=3.288, df=6			t, df	t=4.157, df=6			t, df	t=1.334, df=6			t, df	t=4.644, df=6			t, df	t=6.105, df=6			t, df	t=6.795, df=6			t, df	t=4.744, df=6
	How big is the difference?				How big is the difference?				How big is the difference?				How big is the difference?				How big is the difference?				How big is the difference?				How big is the difference?				How big is the difference?				How big is the difference?				How big is the difference?
	Mean of column A	23.13			Mean of column C	33.96			Mean of column E	25.52			Mean of column G	17.9			Mean of column A	23.13			Mean of column A	23.13			Mean of column A	23.13			Mean of column B	4.595			Mean of column B	4.595			Mean of column B	4.595
	Mean of column B	4.595			Mean of column D	17.05			Mean of column F	33.08			Mean of column H	48.28			Mean of column C	33.96			Mean of column E	25.52			Mean of column G	17.9			Mean of column D	17.05			Mean of column F	33.08			Mean of column H	48.28
	Difference between means (B - A) ± SEM	-18.53 ± 0.8215			Difference between means (D - C) ± SEM	-16.91 ± 3.206			Difference between means (F - E) ± SEM	7.558 ± 4.486			Difference between means (H - G) ± SEM	30.38 ± 9.241			Difference between means (C - A) ± SEM	10.84 ± 2.607			Difference between means (E - A) ± SEM	2.395 ± 1.795			Difference between means (G - A) ± SEM	-5.229 ± 1.126			Difference between means (D - B) ± SEM	12.46 ± 2.040			Difference between means (F - B) ± SEM	28.48 ± 4.192			Difference between means (H - B) ± SEM	43.68 ± 9.208
	95% confidence interval	-20.54 to -16.52			95% confidence interval	-24.76 to -9.064			95% confidence interval	-3.418 to 18.53			95% confidence interval	7.768 to 52.99			95% confidence interval	4.457 to 17.21			95% confidence interval	-1.998 to 6.788			95% confidence interval	-7.984 to -2.473			95% confidence interval	7.463 to 17.45			95% confidence interval	18.23 to 38.74			95% confidence interval	21.15 to 66.21
	R squared (eta squared)	0.9883			R squared (eta squared)	0.8226			R squared (eta squared)	0.3212			R squared (eta squared)	0.643			R squared (eta squared)	0.7423			R squared (eta squared)	0.2287			R squared (eta squared)	0.7823			R squared (eta squared)	0.8614			R squared (eta squared)	0.885			R squared (eta squared)	0.7895
	F test to compare variances				F test to compare variances				F test to compare variances				F test to compare variances				F test to compare variances				F test to compare variances				F test to compare variances				F test to compare variances				F test to compare variances				F test to compare variances
	F, DFn, Dfd	220.8, 3, 3			F, DFn, Dfd	1.472, 3, 3			F, DFn, Dfd	6.884, 3, 3			F, DFn, Dfd	142.3, 3, 3			F, DFn, Dfd	9.113, 3, 3			F, DFn, Dfd	3.799, 3, 3			F, DFn, Dfd	1.127, 3, 3			F, DFn, Dfd	1367, 3, 3			F, DFn, Dfd	5775, 3, 3			F, DFn, Dfd	27874, 3, 3
	P value	0.001			P value	0.7583			P value	0.1474			P value	0.002			P value	0.1024			P value	0.302			P value	0.9238			P value	<0.0001			P value	<0.0001			P value	<0.0001
	P value summary	**			P value summary	ns			P value summary	ns			P value summary	**			P value summary	ns			P value summary	ns			P value summary	ns			P value summary	****			P value summary	****			P value summary	****
	Significantly different (P < 0.05)?	Yes			Significantly different (P < 0.05)?	No			Significantly different (P < 0.05)?	No			Significantly different (P < 0.05)?	Yes			Significantly different (P < 0.05)?	No			Significantly different (P < 0.05)?	No			Significantly different (P < 0.05)?	No			Significantly different (P < 0.05)?	Yes			Significantly different (P < 0.05)?	Yes			Significantly different (P < 0.05)?	Yes
	Data analyzed				Data analyzed				Data analyzed				Data analyzed				Data analyzed				Data analyzed				Data analyzed				Data analyzed				Data analyzed				Data analyzed
	Sample size, column A	4			Sample size, column C	4			Sample size, column E	4			Sample size, column G	4			Sample size, column A	4			Sample size, column A	4			Sample size, column A	4			Sample size, column B	4			Sample size, column B	4			Sample size, column B	4
	Sample size, column B	4			Sample size, column D	4			Sample size, column F	4			Sample size, column H	4			Sample size, column C	4			Sample size, column E	4			Sample size, column G	4			Sample size, column D	4			Sample size, column F	4			Sample size, column H	4
