# Supplementary material for: Overriding impaired FPR chemotaxis signaling in diabetic neutrophil stimulates infection control in murine diabetic wound
Source: eLife. 2022 Feb 3;11:e72071. doi: 10.7554/eLife.72071 (PMC8846594; doi:10.7554/eLife.72071)
Supplement: Figure 1—source data 3. [file elife-72071-fig1-data3.xlsx]

## Sheet: Fig. 1c
	Fig. 1d	Flow-Neutrophils
	C57B				db/db
	37.663	23.1841	27.8539	24.1287	0.125474		0.082768	0.041195	0.033874
		C57B
		vs.
		db/db
	Unpaired t test
	P value	0.0001
	P value summary	***
	Significantly different (P < 0.05)?	Yes
	One- or two-tailed P value?	Two-tailed
	t, df	t=8.503, df=6
	How big is the difference?
	Mean of column C	0.07083
	Mean of column G	28.21
	Difference between means (G - C) ± SEM	28.14 ± 3.309
	95% confidence interval	20.04 to 36.23
	R squared (eta squared)	0.9234
	F test to compare variances
	F, DFn, Dfd	24459, 3, 3
	P value	<0.0001
	P value summary	****
	Significantly different (P < 0.05)?	Yes
	Data analyzed
	Sample size, column C	4
	Sample size, column G	4
