# Supplementary material for: Overriding impaired FPR chemotaxis signaling in diabetic neutrophil stimulates infection control in murine diabetic wound
Source: eLife. 2022 Feb 3;11:e72071. doi: 10.7554/eLife.72071 (PMC8846594; doi:10.7554/eLife.72071)
Supplement: Figure 2—figure supplement 1—source data 1. [file elife-72071-fig2-figsupp1-data1.xlsx]

## Sheet: Sheet1
Figure 2-figure supplement 1d
Chemotaxis fmLP murine Neutrophils
	90mg/dL			300mg/dL
0.01nM	321	444	629	489	346	474
0.1nM	634	483	431	521	465	559
1nM	509	422	489	520	366	531
10nM	681	613	695	554	427	516
100nM	857	1049	541	321	461	623
200nM	793	422	664	506	383	393
500nM	361	257	293	234	230	254
10000nM	278	305	266	225	264	186
					Table Analyzed	Chemotaxis fMLP
	90-10nM
	vs				Two-way ANOVA
	300-10nM
					Source of Variation	% of total variation	P value
Unpaired t test					Interaction	10.36	0.1197
P value	0.0224				Column Factor	9.43	0.0019
P value summary	*				Row Factor	54.02	< 0.0001
Are means signif. different? (P < 0.05)	Yes
One- or two-tailed P value?	Two-tailed				Source of Variation	P value summary	Significant?
t, df	t=3.615 df=4				Interaction	ns	No
					Column Factor	**	Yes
How big is the difference?					Row Factor	***	Yes
Mean ± SEM of column A	663.0 ± 25.32 N=3
Mean ± SEM of column B	499.0 ± 37.63 N=3				Source of Variation	Df	Sum-of-squares	Mean square	F
Difference between means	164.0 ± 45.36				Interaction	7	153523	21932	1.809
95% confidence interval	38.08 to 289.9				Column Factor	1	139644	139644	11.52
R square	0.7657				Row Factor	7	800335	114334	9.43
					Residual	32	387963	12124
F test to compare variances
F,DFn, Dfd	2.208, 2, 2				Number of missing values	0
P value	0.6234
P value summary	ns				Bonferroni posttests
Are variances significantly different?	No
					Column A vs Column B
					Row Factor	Column A	Column B	Difference	95% CI of diff.
					0.01nM	464.7	436.3	-28.33	-291.5 to 234.8
					0.1nM	516	515	-1	-264.2 to 262.2
					1nM	473.3	472.3	-1	-264.2 to 262.2
					10nM	663	499	-164	-427.2 to 99.16
					100nM	815.7	468.3	-347.3	-610.5 to -84.17
					200nM	626.3	427.3	-199	-462.2 to 64.16
					500nM	303.7	239.3	-64.33	-327.5 to 198.8
					10000nM	283	225	-58	-321.2 to 205.2
					Row Factor	Difference	t	P value	Summary
					0.01nM	-28.33	0.3152	P > 0.05	ns
					0.1nM	-1	0.01112	P > 0.05	ns
					1nM	-1	0.01112	P > 0.05	ns
					10nM	-164	1.824	P > 0.05	ns
					100nM	-347.3	3.863	P<0.01	**
					200nM	-199	2.213	P > 0.05	ns
					500nM	-64.33	0.7156	P > 0.05	ns
					10000nM	-58	0.6451	P > 0.05	ns
