# Supplementary material for: Overriding impaired FPR chemotaxis signaling in diabetic neutrophil stimulates infection control in murine diabetic wound
Source: eLife. 2022 Feb 3;11:e72071. doi: 10.7554/eLife.72071 (PMC8846594; doi:10.7554/eLife.72071)
Supplement: Figure 2—figure supplement 2—source data 1. [file elife-72071-fig2-figsupp2-data1.xlsx]

## Sheet: Sheet1
Figure 2-figure supplement 2a
RT-PCR-Fpr1
90-1h	300-1h	90-2h	300-2h	90-3h	300-3h
0.942036	0.285389	0.723384	0.345669	0.887722	0.29725
1.10582	0.352922	0.828668	0.478394	1.09633	0.30579
0.952145	0.386954	0.973407	0.393958	1.12941	0.297991
0.7237	0.228654	0.799697	0.325809	0.593081	0.202647
1.26976	0.287041	0.826515	0.426959	0.883984	0.230866
1.00654	0.27649	1.01801		0.811298	0.262443
	90-1h				90-2h				90-3h
	vs.				vs.				vs.
	300-1h				300-2h				300-3h
Unpaired t test				Unpaired t test				Unpaired t test
P value	<0.0001			P value	<0.0001			P value	<0.0001
P value summary	****			P value summary	****			P value summary	****
Significantly different (P < 0.05)?	Yes			Significantly different (P < 0.05)?	Yes			Significantly different (P < 0.05)?	Yes
One- or two-tailed P value?	Two-tailed			One- or two-tailed P value?	Two-tailed			One- or two-tailed P value?	Two-tailed
t, df	t=8.942, df=10			t, df	t=8.324, df=9			t, df	t=7.719, df=10
How big is the difference?				How big is the difference?				How big is the difference?
Mean of column A	1			Mean of column C	0.8616			Mean of column E	0.9003
Mean of column B	0.3029			Mean of column D	0.3942			Mean of column F	0.2662
Difference between means (A - B) ± SEM	0.6971 ± 0.07796			Difference between means (C - D) ± SEM	0.4675 ± 0.05616			Difference between means (E - F) ± SEM	0.6341 ± 0.08216
95% confidence interval	0.5234 to 0.8708			95% confidence interval	0.3404 to 0.5945			95% confidence interval	0.4511 to 0.8172
R squared (eta squared)	0.8888			R squared (eta squared)	0.885			R squared (eta squared)	0.8563
F test to compare variances				F test to compare variances				F test to compare variances
F, DFn, Dfd	10.16, 5, 5			F, DFn, Dfd	3.276, 5, 4			F, DFn, Dfd	21.90, 5, 5
P value	0.0236			P value	0.2734			P value	0.0041
P value summary	*			P value summary	ns			P value summary	**
Significantly different (P < 0.05)?	Yes			Significantly different (P < 0.05)?	No			Significantly different (P < 0.05)?	Yes
Data analyzed				Data analyzed				Data analyzed
Sample size, column A	6			Sample size, column C	6			Sample size, column E	6
Sample size, column B	6			Sample size, column D	5			Sample size, column F	6
