# Supplementary material for: Overriding impaired FPR chemotaxis signaling in diabetic neutrophil stimulates infection control in murine diabetic wound
Source: eLife. 2022 Feb 3;11:e72071. doi: 10.7554/eLife.72071 (PMC8846594; doi:10.7554/eLife.72071)
Supplement: Figure 2—figure supplement 2—source data 3. [file elife-72071-fig2-figsupp2-data3.xlsx]

## Sheet: Sheet1
Figure 2-figure supplement 2c
Western blots-FPR1
90-1h	300-1h	90-2h	300-2h	90-3h	300-3h
1	0.298	0.971	0.245	0.764	0.114
1	0.689	0.961	0.704	0.936	0.331
1	0.078	0.971	0.068	1.091	0.186
1	0.368	0.921	0.355	1.005	0.262
Column A	90-1h			Column C	90-2h			Column E	90-3h
vs.	vs.			vs.	vs.			vs.	vs.
Column B	300-1h			Column D	300-2h			Column F	300-3h
Unpaired t test				Unpaired t test				Unpaired t test
P value	0.0023			P value	0.0039			P value	0.0001
P value summary	**			P value summary	**			P value summary	***
Significantly different (P < 0.05)?	Yes			Significantly different (P < 0.05)?	Yes			Significantly different (P < 0.05)?	Yes
One- or two-tailed P value?	Two-tailed			One- or two-tailed P value?	Two-tailed			One- or two-tailed P value?	Two-tailed
t, df	t=5.078, df=6			t, df	t=4.554, df=6			t, df	t=8.668, df=6
How big is the difference?				How big is the difference?				How big is the difference?
Mean of column A	1			Mean of column C	0.956			Mean of column E	0.949
Mean of column B	0.3583			Mean of column D	0.343			Mean of column F	0.2233
Difference between means (A - B) ± SEM	0.6418 ± 0.1264			Difference between means (C - D) ± SEM	0.6130 ± 0.1346			Difference between means (E - F) ± SEM	0.7258 ± 0.08373
95% confidence interval	0.3325 to 0.9510			95% confidence interval	0.2837 to 0.9423			95% confidence interval	0.5209 to 0.9306
R squared (eta squared)	0.8112			R squared (eta squared)	0.7756			R squared (eta squared)	0.926
F test to compare variances				F test to compare variances				F test to compare variances
F, DFn, Dfd	Infinity, 3, 3			F, DFn, Dfd	126.9, 3, 3			F, DFn, Dfd	2.183, 3, 3
P value	<0.0001			P value	0.0023			P value	0.538
P value summary	****			P value summary	**			P value summary	ns
Significantly different (P < 0.05)?	Yes			Significantly different (P < 0.05)?	Yes			Significantly different (P < 0.05)?	No
Data analyzed				Data analyzed				Data analyzed
Sample size, column A	4			Sample size, column C	4			Sample size, column E	4
Sample size, column B	4			Sample size, column D	4			Sample size, column F	4
