# Supplementary material for: Overriding impaired FPR chemotaxis signaling in diabetic neutrophil stimulates infection control in murine diabetic wound
Source: eLife. 2022 Feb 3;11:e72071. doi: 10.7554/eLife.72071 (PMC8846594; doi:10.7554/eLife.72071)
Supplement: Figure 2—figure supplement 3—source data 1. [file elife-72071-fig2-figsupp3-data1.xlsx]

## Sheet: Sheet1
Figure 2-figure supplement 3a
RT-PCR-Fpr2
90-1h	300-1h	90-2h	300-2h	90-3h	300-3h
0.955395	0.261248	0.713726	0.058526	1.25595	0.0512102
0.960762	0.278193	0.721427	0.0563336	0.795975	0.0635152
1.08384	0.244625	1.33991	0.0566668	1.26781	0.0666997
0.985847	0.335626		0.132562	0.701273	0.108723
1.01415	0.270445		0.142621		0.098664
	90-1h				90-2h				90-3h
	vs.				vs.				vs.
	300-1h				300-2h				300-3h
Unpaired t test				Unpaired t test				Unpaired t test
P value	<0.0001			P value	0.0016			P value	0.0002
P value summary	****			P value summary	**			P value summary	***
Significantly different (P < 0.05)?	Yes			Significantly different (P < 0.05)?	Yes			Significantly different (P < 0.05)?	Yes
One- or two-tailed P value?	Two-tailed			One- or two-tailed P value?	Two-tailed			One- or two-tailed P value?	Two-tailed
t, df	t=25.74, df=8			t, df	t=5.434, df=6			t, df	t=7.035, df=7
How big is the difference?				How big is the difference?				How big is the difference?
Mean of column A	1			Mean of column C	0.925			Mean of column E	1.005
Mean of column B	0.278			Mean of column D	0.08934			Mean of column F	0.07776
Difference between means (A - B) ± SEM	0.7220 ± 0.02805			Difference between means (C - D) ± SEM	0.8357 ± 0.1538			Difference between means (E - F) ± SEM	0.9275 ± 0.1318
95% confidence interval	0.6573 to 0.7866			95% confidence interval	0.4594 to 1.212			95% confidence interval	0.6157 to 1.239
R squared (eta squared)	0.9881			R squared (eta squared)	0.8311			R squared (eta squared)	0.8761
F test to compare variances				F test to compare variances				F test to compare variances
F, DFn, Dfd	2.296, 4, 4			F, DFn, Dfd	66.10, 2, 4			F, DFn, Dfd	147.3, 3, 4
P value	0.4405			P value	0.0017			P value	0.0003
P value summary	ns			P value summary	**			P value summary	***
Significantly different (P < 0.05)?	No			Significantly different (P < 0.05)?	Yes			Significantly different (P < 0.05)?	Yes
Data analyzed				Data analyzed				Data analyzed
Sample size, column A	5			Sample size, column C	3			Sample size, column E	4
Sample size, column B	5			Sample size, column D	5			Sample size, column F	5
