# Supplementary material for: Overriding impaired FPR chemotaxis signaling in diabetic neutrophil stimulates infection control in murine diabetic wound
Source: eLife. 2022 Feb 3;11:e72071. doi: 10.7554/eLife.72071 (PMC8846594; doi:10.7554/eLife.72071)
Supplement: Figure 2—figure supplement 3—source data 3. [file elife-72071-fig2-figsupp3-data3.xlsx]

## Sheet: Sheet1
Figure 2-figure supplement 3c
Western blots-FPR2
90-1h	300-1h	90-2h	300-2h	90-3h	300-3h
1	0.425	0.953	0.387	0.831	0.365
1	0.585	0.853	0.507	1.069	0.409
1	0.467	0.848	0.348	0.718	0.182
1	0.475	0.691	0.393	0.735	0.358
	90-1h				90-2h				90-3h
	vs.				vs.				vs.
	300-1h				300-2h				300-3h
Unpaired t test				Unpaired t test				Unpaired t test
P value	<0.0001			P value	0.0005			P value	0.0017
P value summary	****			P value summary	***			P value summary	**
Significantly different (P < 0.05)?	Yes			Significantly different (P < 0.05)?	Yes			Significantly different (P < 0.05)?	Yes
One- or two-tailed P value?	Two-tailed			One- or two-tailed P value?	Two-tailed			One- or two-tailed P value?	Two-tailed
t, df	t=15.00, df=6			t, df	t=6.676, df=6			t, df	t=5.359, df=6
How big is the difference?				How big is the difference?				How big is the difference?
Mean of column A	1			Mean of column C	0.8363			Mean of column E	0.8383
Mean of column B	0.488			Mean of column D	0.4088			Mean of column F	0.3285
Difference between means (A - B) ± SEM	0.5120 ± 0.03414			Difference between means (C - D) ± SEM	0.4275 ± 0.06404			Difference between means (E - F) ± SEM	0.5098 ± 0.09512
95% confidence interval	0.4285 to 0.5955			95% confidence interval	0.2708 to 0.5842			95% confidence interval	0.2770 to 0.7425
R squared (eta squared)	0.974			R squared (eta squared)	0.8813			R squared (eta squared)	0.8272
F test to compare variances				F test to compare variances				F test to compare variances
F, DFn, Dfd	Infinity, 3, 3			F, DFn, Dfd	2.499, 3, 3			F, DFn, Dfd	2.601, 3, 3
P value	<0.0001			P value	0.4717			P value	0.4531
P value summary	****			P value summary	ns			P value summary	ns
Significantly different (P < 0.05)?	Yes			Significantly different (P < 0.05)?	No			Significantly different (P < 0.05)?	No
Data analyzed				Data analyzed				Data analyzed
Sample size, column A	4			Sample size, column C	4			Sample size, column E	4
Sample size, column B	4			Sample size, column D	4			Sample size, column F	4
