# Supplementary material for: Overriding impaired FPR chemotaxis signaling in diabetic neutrophil stimulates infection control in murine diabetic wound
Source: eLife. 2022 Feb 3;11:e72071. doi: 10.7554/eLife.72071 (PMC8846594; doi:10.7554/eLife.72071)
Supplement: Figure 2—source data 1. [file elife-72071-fig2-data1.xlsx]

## Sheet: Fig. 2a
Fig. 2a	Chemotaxis
C57B			db/db
1638	1468	1439	1064	978	821
Column B	db/db
vs.	vs.
Column A	C57B
Paired t test
P value	0.0045
P value summary	**
Significantly different (P < 0.05)?	Yes
One- or two-tailed P value?	Two-tailed
t, df	t=14.93, df=2
Number of pairs	3
How big is the difference?
Mean of differences (B - A)	-560.7
SD of differences	65.03
SEM of differences	37.55
95% confidence interval	-722.2 to -399.1
R squared (partial eta squared)	0.9911
How effective was the pairing?
Correlation coefficient (r)	0.8497
P value (one tailed)	0.1768
P value summary	ns
Was the pairing significantly effective?	No
