# Supplementary material for: Overriding impaired FPR chemotaxis signaling in diabetic neutrophil stimulates infection control in murine diabetic wound
Source: eLife. 2022 Feb 3;11:e72071. doi: 10.7554/eLife.72071 (PMC8846594; doi:10.7554/eLife.72071)
Supplement: Figure 2—source data 3. [file elife-72071-fig2-data3.xlsx]

## Sheet: Fig. 2c
Fig. 2c	Western blotting-FPR1
C57B	db/db
1	0.0812466
1	0.678053
1	0.268799
1	0.252375
Column B	db/db
vs.	vs.
Column A	C57B
Unpaired t test
P value	0.0017
P value summary	**
Significantly different (P < 0.05)?	Yes
One- or two-tailed P value?	Two-tailed
t, df	t=5.369, df=6
How big is the difference?
Mean of column A	1
Mean of column B	0.3201
Difference between means (B - A) ± SEM	-0.6799 ± 0.1266
95% confidence interval	-0.9897 to -0.3700
R squared (eta squared)	0.8277
F test to compare variances
F, DFn, Dfd	Infinity, 3, 3
P value	<0.0001
P value summary	****
Significantly different (P < 0.05)?	Yes
Data analyzed
Sample size, column A	4
Sample size, column B	4
