# Supplementary material for: Overriding impaired FPR chemotaxis signaling in diabetic neutrophil stimulates infection control in murine diabetic wound
Source: eLife. 2022 Feb 3;11:e72071. doi: 10.7554/eLife.72071 (PMC8846594; doi:10.7554/eLife.72071)
Supplement: Figure 2—source data 4. [file elife-72071-fig2-data4.xlsx]

## Sheet: Fig. 2d
Fig. 2d	Flow-FPR1
C57B
33.3	27	33.3
db/db
17.1	16.3	14.3
	C57B
	vs.
	db/db
Unpaired t test
P value	0.0025
P value summary	**
Significantly different (P < 0.05)?	Yes
One- or two-tailed P value?	Two-tailed
t, df	t=6.773, df=4
How big is the difference?
Mean of column A	15.9
Mean of column B	31.2
Difference between means (B - A) ± SEM	15.30 ± 2.259
95% confidence interval	9.028 to 21.57
R squared (eta squared)	0.9198
F test to compare variances
F, DFn, Dfd	6.361, 2, 2
P value	0.2717
P value summary	ns
Significantly different (P < 0.05)?	No
Data analyzed
Sample size, column A	3
Sample size, column B	3
