# Supplementary material for: Overriding impaired FPR chemotaxis signaling in diabetic neutrophil stimulates infection control in murine diabetic wound
Source: eLife. 2022 Feb 3;11:e72071. doi: 10.7554/eLife.72071 (PMC8846594; doi:10.7554/eLife.72071)
Supplement: Figure 2—source data 5. [file elife-72071-fig2-data5.xlsx]

## Sheet: Fig. 2e
Fig. 2e	Chemotaxis-human
90 mg/dl	200 mg/dl	300 mg/dl	400 mg/dl	500 mg/dl
998	464	345	338	299
907	454	251	160	335
719	524	541	413	222
1173	647	494	413	310
Column B	200 mg/dl				Column C	300 mg/dl			Column D	400 mg/dl			Column E	500 mg/dl
vs.	vs.				vs.	vs.			vs.	vs.			vs.	vs.
Column A	90 mg/dl				Column A	90 mg/dl			Column A	90 mg/dl			Column A	90 mg/dl
Unpaired t test with Welch's correction					Unpaired t test with Welch's correction				Unpaired t test with Welch's correction				Unpaired t test with Welch's correction
P value	0.0132				P value	0.0045			P value	0.0025			P value	0.0045
P value summary	*				P value summary	**			P value summary	**			P value summary	**
Significantly different (P < 0.05)?	Yes				Significantly different (P < 0.05)?	Yes			Significantly different (P < 0.05)?	Yes			Significantly different (P < 0.05)?	Yes
One- or two-tailed P value?	Two-tailed				One- or two-tailed P value?	Two-tailed			One- or two-tailed P value?	Two-tailed			One- or two-tailed P value?	Two-tailed
Welch-corrected t, df	t=4.089, df=4.260				Welch-corrected t, df	t=4.676, df=5.402			Welch-corrected t, df	t=5.530, df=5.063			Welch-corrected t, df	t=6.738, df=3.397
How big is the difference?					How big is the difference?				How big is the difference?				How big is the difference?
Mean of column A	949.3				Mean of column A	949.3			Mean of column A	949.3			Mean of column A	949.3
Mean of column B	522.3				Mean of column C	407.8			Mean of column D	331			Mean of column E	291.5
Difference between means (B - A) ± SEM	-427.0 ± 104.4				Difference between means (C - A) ± SEM	-541.5 ± 115.8			Difference between means (D - A) ± SEM	-618.3 ± 111.8			Difference between means (E - A) ± SEM	-657.8 ± 97.62
95% confidence interval	-710.1 to -143.9				95% confidence interval	-832.7 to -250.3			95% confidence interval	-904.6 to -331.9			95% confidence interval	-948.9 to -366.6
R squared (eta squared)	0.7969				R squared (eta squared)	0.8019			R squared (eta squared)	0.858			R squared (eta squared)	0.9304
F test to compare variances					F test to compare variances				F test to compare variances				F test to compare variances
F, DFn, Dfd	4.541, 3, 3				F, DFn, Dfd	1.997, 3, 3			F, DFn, Dfd	2.509, 3, 3			F, DFn, Dfd	15.06, 3, 3
P value	0.2457				P value	0.5844			P value	0.4698			P value	0.0518
P value summary	ns				P value summary	ns			P value summary	ns			P value summary	ns
Significantly different (P < 0.05)?	No				Significantly different (P < 0.05)?	No			Significantly different (P < 0.05)?	No			Significantly different (P < 0.05)?	No
Data analyzed					Data analyzed				Data analyzed				Data analyzed
Sample size, column A	4				Sample size, column A	4			Sample size, column A	4			Sample size, column A	4
Sample size, column B	4				Sample size, column C	4			Sample size, column D	4			Sample size, column E	4
