# Supplementary material for: Overriding impaired FPR chemotaxis signaling in diabetic neutrophil stimulates infection control in murine diabetic wound
Source: eLife. 2022 Feb 3;11:e72071. doi: 10.7554/eLife.72071 (PMC8846594; doi:10.7554/eLife.72071)
Supplement: Figure 2—source data 6. [file elife-72071-fig2-data6.xlsx]

## Sheet: Fig. 2f
Fig. 2f	Chemotaxis-murine
90 mg/dl	200 mg/dl	300 mg/dl	400 mg/dl	500 mg/dl
658	445	617	964	548
1378	860	398	448	852
1622	219	445	423	468
585	372	544	891	475
1305	787	325	375	779
1549	146	372	350	395
Column B	200 mg/dl			Column C	300 mg/dl			Column D	400 mg/dl			Column E	500 mg/dl
vs.	vs.			vs.	vs.			vs.	vs.			vs.	vs.
Column A	90 mg/dl			Column A	90 mg/dl			Column A	90 mg/dl			Column A	90 mg/dl
Unpaired t test				Unpaired t test				Unpaired t test				Unpaired t test
P value	0.0088			P value	0.0031			P value	0.0182			P value	0.0133
P value summary	**			P value summary	**			P value summary	*			P value summary	*
Significantly different (P < 0.05)?	Yes			Significantly different (P < 0.05)?	Yes			Significantly different (P < 0.05)?	Yes			Significantly different (P < 0.05)?	Yes
One- or two-tailed P value?	Two-tailed			One- or two-tailed P value?	Two-tailed			One- or two-tailed P value?	Two-tailed			One- or two-tailed P value?	Two-tailed
t, df	t=3.243, df=10			t, df	t=3.872, df=10			t, df	t=2.819, df=10			t, df	t=3.002, df=10
How big is the difference?				How big is the difference?				How big is the difference?				How big is the difference?
Mean of column A	1183			Mean of column A	1183			Mean of column A	1183			Mean of column A	1183
Mean of column B	471.5			Mean of column C	450.2			Mean of column D	575.2			Mean of column E	586.2
Difference between means (B - A) ± SEM	-711.3 ± 219.4			Difference between means (C - A) ± SEM	-732.7 ± 189.2			Difference between means (D - A) ± SEM	-607.7 ± 215.5			Difference between means (E - A) ± SEM	-596.7 ± 198.7
95% confidence interval	-1200 to -222.6			95% confidence interval	-1154 to -311.1			95% confidence interval	-1088 to -127.4			95% confidence interval	-1039 to -153.8
R squared (eta squared)	0.5126			R squared (eta squared)	0.5999			R squared (eta squared)	0.4428			R squared (eta squared)	0.474
F test to compare variances				F test to compare variances				F test to compare variances				F test to compare variances
F, DFn, Dfd	2.351, 5, 5			F, DFn, Dfd	16.56, 5, 5			F, DFn, Dfd	2.658, 5, 5			F, DFn, Dfd	5.882, 5, 5
P value	0.3698			P value	0.0079			P value	0.3071			P value	0.0742
P value summary	ns			P value summary	**			P value summary	ns			P value summary	ns
Significantly different (P < 0.05)?	No			Significantly different (P < 0.05)?	Yes			Significantly different (P < 0.05)?	No			Significantly different (P < 0.05)?	No
Data analyzed				Data analyzed				Data analyzed				Data analyzed
Sample size, column A	6			Sample size, column A	6			Sample size, column A	6			Sample size, column A	6
Sample size, column B	6			Sample size, column C	6			Sample size, column D	6			Sample size, column E	6
