# Supplementary material for: Overriding impaired FPR chemotaxis signaling in diabetic neutrophil stimulates infection control in murine diabetic wound
Source: eLife. 2022 Feb 3;11:e72071. doi: 10.7554/eLife.72071 (PMC8846594; doi:10.7554/eLife.72071)
Supplement: Figure 2—source data 7. [file elife-72071-fig2-data7.xlsx]

## Sheet: Sheet1
Fig. 2h
90 mg/dL	300 mg/dL
1185	620
1024	412
1990	1640
1964	1196
Column B	300
vs.	vs.
Column A	90
Paired t test
P value	0.0069
P value summary	**
Significantly different (P < 0.05)?	Yes
One- or two-tailed P value?	Two-tailed
t, df	t=6.650, df=3
Number of pairs	4
How big is the difference?
Mean of differences (B - A)	-573.8
SD of differences	172.6
SEM of differences	86.28
95% confidence interval	-848.3 to -299.2
R squared (partial eta squared)	0.9365
How effective was the pairing?
Correlation coefficient (r)	0.9519
P value (one tailed)	0.0241
P value summary	*
Was the pairing significantly effective?	Yes
