# Supplementary material for: Overriding impaired FPR chemotaxis signaling in diabetic neutrophil stimulates infection control in murine diabetic wound
Source: eLife. 2022 Feb 3;11:e72071. doi: 10.7554/eLife.72071 (PMC8846594; doi:10.7554/eLife.72071)
Supplement: Figure 2—source data 9. [file elife-72071-fig2-data9.xlsx]

## Sheet: Sheet1
Fig. 2j	Western-FPR1											Western-PLCg1
90mg/dl	200mg/dl	300mg/dl	500mg/dl									90mg/dl	200mg/dl	300mg/dl	500mg/dl
1	0.79	0.28	0.05									1	1.02	0.21	0.27
1	0.24	0.18	0.11									1	0.04	0.04	0.02
1	0.18	0.03	0.01									1	0.72	0.02	0.02
1	0.08	0.08	0.09
	200mg/dl				300mg/dl				500mg/dl				200mg/dl				300mg/dl				500mg/dl
	vs.				vs.				vs.				vs.				vs.				vs.
	90mg/dl				90mg/dl				90mg/dl				90mg/dl				90mg/dl				90mg/dl
Unpaired t test				Unpaired t test				Unpaired t test				Unpaired t test				Unpaired t test				Unpaired t test
P value	0.0054			P value	<0.0001			P value	<0.0001			P value	0.2333			P value	0.0001			P value	0.0004
P value summary	**			P value summary	****			P value summary	****			P value summary	ns			P value summary	***			P value summary	***
Significantly different (P < 0.05)?	Yes			Significantly different (P < 0.05)?	Yes			Significantly different (P < 0.05)?	Yes			Significantly different (P < 0.05)?	No			Significantly different (P < 0.05)?	Yes			Significantly different (P < 0.05)?	Yes
One- or two-tailed P value?	Two-tailed			One- or two-tailed P value?	Two-tailed			One- or two-tailed P value?	Two-tailed			One- or two-tailed P value?	Two-tailed			One- or two-tailed P value?	Two-tailed			One- or two-tailed P value?	Two-tailed
t, df	t=4.253, df=6			t, df	t=15.47, df=6			t, df	t=42.17, df=6			t, df	t=1.403, df=4			t, df	t=15.10, df=4			t, df	t=10.76, df=4
How big is the difference?				How big is the difference?				How big is the difference?				How big is the difference?				How big is the difference?				How big is the difference?
Mean of column A	1			Mean of column A	1			Mean of column A	1			Mean of column A	1			Mean of column A	1			Mean of column A	1
Mean of column B	0.3225			Mean of column C	0.1425			Mean of column D	0.065			Mean of column B	0.5933			Mean of column C	0.09			Mean of column D	0.1033
Difference between means (B - A) ± SEM	-0.6775 ± 0.1593			Difference between means (C - A) ± SEM	-0.8575 ± 0.05543			Difference between means (D - A) ± SEM	-0.9350 ± 0.02217			Difference between means (B - A) ± SEM	-0.4067 ± 0.2899			Difference between means (C - A) ± SEM	-0.9100 ± 0.06028			Difference between means (D - A) ± SEM	-0.8967 ± 0.08333
95% confidence interval	-1.067 to -0.2877			95% confidence interval	-0.9931 to -0.7219			95% confidence interval	-0.9893 to -0.8807			95% confidence interval	-1.212 to 0.3982			95% confidence interval	-1.077 to -0.7426			95% confidence interval	-1.128 to -0.6653
R squared (eta squared)	0.7509			R squared (eta squared)	0.9755			R squared (eta squared)	0.9966			R squared (eta squared)	0.3297			R squared (eta squared)	0.9828			R squared (eta squared)	0.9666
F test to compare variances				F test to compare variances				F test to compare variances				F test to compare variances				F test to compare variances				F test to compare variances
F, DFn, Dfd	Infinity, 3, 3			F, DFn, Dfd	Infinity, 3, 3			F, DFn, Dfd	Infinity, 3, 3			F, DFn, Dfd	Infinity, 2, 2			F, DFn, Dfd	Infinity, 2, 2			F, DFn, Dfd	Infinity, 2, 2
P value	<0.0001			P value	<0.0001			P value	<0.0001			P value	<0.0001			P value	<0.0001			P value	<0.0001
P value summary	****			P value summary	****			P value summary	****			P value summary	****			P value summary	****			P value summary	****
Significantly different (P < 0.05)?	Yes			Significantly different (P < 0.05)?	Yes			Significantly different (P < 0.05)?	Yes			Significantly different (P < 0.05)?	Yes			Significantly different (P < 0.05)?	Yes			Significantly different (P < 0.05)?	Yes
Data analyzed				Data analyzed				Data analyzed				Data analyzed				Data analyzed				Data analyzed
Sample size, column A	4			Sample size, column A	4			Sample size, column A	4			Sample size, column A	3			Sample size, column A	3			Sample size, column A	3
Sample size, column B	4			Sample size, column C	4			Sample size, column D	4			Sample size, column B	3			Sample size, column C	3			Sample size, column D	3
