# Supplementary material for: Overriding impaired FPR chemotaxis signaling in diabetic neutrophil stimulates infection control in murine diabetic wound
Source: eLife. 2022 Feb 3;11:e72071. doi: 10.7554/eLife.72071 (PMC8846594; doi:10.7554/eLife.72071)
Supplement: Figure 2—source data 10. [file elife-72071-fig2-data10.xlsx]

## Sheet: Sheet1
Fig. 2k	Cyclic AMP
90mg/dl			200mg/dl			300mg/dl			500mg/dl
721	669.6	731.8	316.1	362.7	578.6	238.3	272.4	112	64.26	34.55	65.8
	200mg/dl				300mg/dl					500mg/dl
	vs.				vs.					vs.
	90mg/dl				90mg/dl					90mg/dl
Unpaired t test				Unpaired t test					Unpaired t test
P value	0.0256			P value	0.0007				P value	<0.0001
P value summary	*			P value summary	***				P value summary	****
Significantly different (P < 0.05)?	Yes			Significantly different (P < 0.05)?	Yes				Significantly different (P < 0.05)?	Yes
One- or two-tailed P value?	Two-tailed			One- or two-tailed P value?	Two-tailed				One- or two-tailed P value?	Two-tailed
t, df	t=3.469, df=4			t, df	t=9.536, df=4				t, df	t=30.05, df=4
How big is the difference?				How big is the difference?					How big is the difference?
Mean of column A	707.5			Mean of column A	707.5				Mean of column A	707.5
Mean of column B	419.1			Mean of column C	207.6				Mean of column D	54.87
Difference between means (B - A) ± SEM	-288.3 ± 83.11			Difference between means (C - A) ± SEM	-499.9 ± 52.42				Difference between means (D - A) ± SEM	-652.6 ± 21.72
95% confidence interval	-519.1 to -57.59			95% confidence interval	-645.5 to -354.3				95% confidence interval	-712.9 to -592.3
R squared (eta squared)	0.7506			R squared (eta squared)	0.9579				R squared (eta squared)	0.9956
F test to compare variances				F test to compare variances					F test to compare variances
F, DFn, Dfd	17.76, 2, 2			F, DFn, Dfd	6.464, 2, 2				F, DFn, Dfd	3.560, 2, 2
P value	0.1066			P value	0.2679				P value	0.4386
P value summary	ns			P value summary	ns				P value summary	ns
Significantly different (P < 0.05)?	No			Significantly different (P < 0.05)?	No				Significantly different (P < 0.05)?	No
Data analyzed				Data analyzed					Data analyzed
Sample size, column A	3			Sample size, column A	3				Sample size, column A	3
Sample size, column B	3			Sample size, column C	3				Sample size, column D	3
