# Supplementary material for: Overriding impaired FPR chemotaxis signaling in diabetic neutrophil stimulates infection control in murine diabetic wound
Source: eLife. 2022 Feb 3;11:e72071. doi: 10.7554/eLife.72071 (PMC8846594; doi:10.7554/eLife.72071)
Supplement: Figure 2—source data 11. [file elife-72071-fig2-data11.xlsx]

## Sheet: Sheet1
Fig. 2l-RT-PCR
Fpr1
90-1h	300-1h
0.983592	0.432022
1.01641	0.653133
0.982562	0.69691
1.01744	0.489659
	300-1h
	vs.
	90-1h
Unpaired t test
P value	0.0005
P value summary	***
Significantly different (P < 0.05)?	Yes
One- or two-tailed P value?	Two-tailed
t, df	t=6.718, df=6
How big is the difference?
Mean of column A	1
Mean of column B	0.5679
Difference between means (B - A) ± SEM	-0.4321 ± 0.06432
95% confidence interval	-0.5894 to -0.2747
R squared (eta squared)	0.8827
F test to compare variances
F, DFn, Dfd	42.29, 3, 3
P value	0.0118
P value summary	*
Significantly different (P < 0.05)?	Yes
Data analyzed
Sample size, column A	4
Sample size, column B	4
