# Supplementary material for: Overriding impaired FPR chemotaxis signaling in diabetic neutrophil stimulates infection control in murine diabetic wound
Source: eLife. 2022 Feb 3;11:e72071. doi: 10.7554/eLife.72071 (PMC8846594; doi:10.7554/eLife.72071)
Supplement: Figure 2—source data 12. — mRNA data for Plcγ by RT-PCR. [file elife-72071-fig2-data12.xlsx]

## Sheet: Sheet1
Fig. 2m-RT-PCR
Plcg1
90-1h	300-1h
1.00378	0.34065
0.996224	0.453808
1.38776	0.587876
0.61224	0.562252
	300-1h
	vs.
	90-1h
Unpaired t test
P value	0.0223
P value summary	*
Significantly different (P < 0.05)?	Yes
One- or two-tailed P value?	Two-tailed
t, df	t=3.057, df=6
How big is the difference?
Mean of column A	1
Mean of column B	0.4861
Difference between means (B - A) ± SEM	-0.5139 ± 0.1681
95% confidence interval	-0.9252 to -0.1025
R squared (eta squared)	0.609
F test to compare variances
F, DFn, Dfd	7.841, 3, 3
P value	0.1247
P value summary	ns
Significantly different (P < 0.05)?	No
Data analyzed
Sample size, column A	4
Sample size, column B	4
