# Supplementary material for: Overriding impaired FPR chemotaxis signaling in diabetic neutrophil stimulates infection control in murine diabetic wound
Source: eLife. 2022 Feb 3;11:e72071. doi: 10.7554/eLife.72071 (PMC8846594; doi:10.7554/eLife.72071)
Supplement: Figure 3—figure supplement 1—source data 1. [file elife-72071-fig3-figsupp1-data1.xlsx]

## Sheet: Sheet1
Figure 3-figure supplement 1b
flow cytometry data
90mg/dL	300mg/dL
117.61	126.15
132.82	136.75
157.59	144.88
81.76	92.36
	300
	vs.
	90
Unpaired t test
P value	0.8993
P value summary	ns
Significantly different (P < 0.05)?	No
One- or two-tailed P value?	Two-tailed
t, df	t=0.1320, df=6
How big is the difference?
Mean of column A	122.4
Mean of column B	125
Difference between means (B - A) ± SEM	2.590 ± 19.62
95% confidence interval	-45.43 to 50.61
R squared (eta squared)	0.002895
F test to compare variances
F, DFn, Dfd	1.888, 3, 3
P value	0.6146
P value summary	ns
Significantly different (P < 0.05)?	No
Data analyzed
Sample size, column A	4
Sample size, column B	4
