# Supplementary material for: Overriding impaired FPR chemotaxis signaling in diabetic neutrophil stimulates infection control in murine diabetic wound
Source: eLife. 2022 Feb 3;11:e72071. doi: 10.7554/eLife.72071 (PMC8846594; doi:10.7554/eLife.72071)
Supplement: Figure 3—figure supplement 1—source data 2. [file elife-72071-fig3-figsupp1-data2.xlsx]

## Sheet: Sheet1
	Figure 3-figure supplement 1c
	Chemotaxis response
Glucose(mg/dL)	90	200	300	400	500
	528	659	1023	646	502
	413	857	846	710	672
	549	543	872	686	470
	518	578	1003	359	765
	707	684	703	715	590
	779	1072	566	748	682
	200				300					400				500
	vs.				vs.					vs.				vs.
	90				90					90				90
Paired t test				Paired t test					Paired t test				Paired t test
P value	0.1029			P value	0.0889				P value	0.3822			P value	0.68
P value summary	ns			P value summary	ns				P value summary	ns			P value summary	ns
Significantly different (P < 0.05)?	No			Significantly different (P < 0.05)?	No				Significantly different (P < 0.05)?	No			Significantly different (P < 0.05)?	No
One- or two-tailed P value?	Two-tailed			One- or two-tailed P value?	Two-tailed				One- or two-tailed P value?	Two-tailed			One- or two-tailed P value?	Two-tailed
t, df	t=1.993, df=5			t, df	t=2.108, df=5				t, df	t=0.9577, df=5			t, df	t=0.4375, df=5
Number of pairs	6			Number of pairs	6				Number of pairs	6			Number of pairs	6
How big is the difference?				How big is the difference?					How big is the difference?				How big is the difference?
Mean of differences (C - B)	149.8			Mean of differences (D - B)	253.2				Mean of differences (E - B)	61.67			Mean of differences (F - B)	31.17
SD of differences	184.2			SD of differences	294.2				SD of differences	157.7			SD of differences	174.5
SEM of differences	75.19			SEM of differences	120.1				SEM of differences	64.39			SEM of differences	71.25
95% confidence interval	-43.45 to 343.1			95% confidence interval	-55.62 to 562.0				95% confidence interval	-103.9 to 227.2			95% confidence interval	-152.0 to 214.3
R squared (partial eta squared)	0.4426			R squared (partial eta squared)	0.4704				R squared (partial eta squared)	0.155			R squared (partial eta squared)	0.03686
How effective was the pairing?				How effective was the pairing?					How effective was the pairing?				How effective was the pairing?
Correlation coefficient (r)	0.4456			Correlation coefficient (r)	-0.7871				Correlation coefficient (r)	0.3605			Correlation coefficient (r)	0.02256
P value (one tailed)	0.1879			P value (one tailed)	0.0316				P value (one tailed)	0.2413			P value (one tailed)	0.4831
P value summary	ns			P value summary	*				P value summary	ns			P value summary	ns
Was the pairing significantly effective?	No			Was the pairing significantly effective?	Yes				Was the pairing significantly effective?	No			Was the pairing significantly effective?	No
