# Supplementary material for: Overriding impaired FPR chemotaxis signaling in diabetic neutrophil stimulates infection control in murine diabetic wound
Source: eLife. 2022 Feb 3;11:e72071. doi: 10.7554/eLife.72071 (PMC8846594; doi:10.7554/eLife.72071)
Supplement: Figure 3—source data 1. [file elife-72071-fig3-data1.xlsx]

## Sheet: Sheet1
Fig. 3a	Human PMNs
90 mg/dl	200 mg/dl	300 mg/dl	400 mg/dl	500 mg/dl
1076	1155	1018	1341	1172
1274	1355	1231	1184	1404
1561	1411	1339	1303	1427
	200 mg/dl				300 mg/dl				400 mg/dl				500 mg/dl
	vs.				vs.				vs.				vs.
	90 mg/dl				90 mg/dl				90 mg/dl				90 mg/dl
Unpaired t test				Unpaired t test				Unpaired t test				Unpaired t test
P value	0.9845			P value	0.5597			P value	0.8613			P value	0.8596
P value summary	ns			P value summary	ns			P value summary	ns			P value summary	ns
Significantly different (P < 0.05)?	No			Significantly different (P < 0.05)?	No			Significantly different (P < 0.05)?	No			Significantly different (P < 0.05)?	No
One- or two-tailed P value?	Two-tailed			One- or two-tailed P value?	Two-tailed			One- or two-tailed P value?	Two-tailed			One- or two-tailed P value?	Two-tailed
t, df	t=0.02073, df=4			t, df	t=0.6354, df=4			t, df	t=0.1863, df=4			t, df	t=0.1885, df=4
How big is the difference?				How big is the difference?				How big is the difference?				How big is the difference?
Mean of column A	1304			Mean of column A	1304			Mean of column A	1304			Mean of column A	1304
Mean of column B	1307			Mean of column C	1196			Mean of column D	1276			Mean of column E	1334
Difference between means (B - A) ± SEM	3.333 ± 160.8			Difference between means (C - A) ± SEM	-107.7 ± 169.5			Difference between means (D - A) ± SEM	-27.67 ± 148.5			Difference between means (E - A) ± SEM	30.67 ± 162.6
95% confidence interval	-443.1 to 449.8			95% confidence interval	-578.2 to 362.8			95% confidence interval	-440.0 to 384.7			95% confidence interval	-420.9 to 482.2
R squared (eta squared)	0.0001074			R squared (eta squared)	0.09167			R squared (eta squared)	0.008601			R squared (eta squared)	0.008809
F test to compare variances				F test to compare variances				F test to compare variances				F test to compare variances
F, DFn, Dfd	3.283, 2, 2			F, DFn, Dfd	2.229, 2, 2			F, DFn, Dfd	8.864, 2, 2			F, DFn, Dfd	2.989, 2, 2
P value	0.4669			P value	0.6194			P value	0.2028			P value	0.5014
P value summary	ns			P value summary	ns			P value summary	ns			P value summary	ns
Significantly different (P < 0.05)?	No			Significantly different (P < 0.05)?	No			Significantly different (P < 0.05)?	No			Significantly different (P < 0.05)?	No
Data analyzed				Data analyzed				Data analyzed				Data analyzed
Sample size, column A	3			Sample size, column A	3			Sample size, column A	3			Sample size, column A	3
Sample size, column B	3			Sample size, column C	3			Sample size, column D	3			Sample size, column E	3
