# Supplementary material for: Overriding impaired FPR chemotaxis signaling in diabetic neutrophil stimulates infection control in murine diabetic wound
Source: eLife. 2022 Feb 3;11:e72071. doi: 10.7554/eLife.72071 (PMC8846594; doi:10.7554/eLife.72071)
Supplement: Figure 3—source data 2. [file elife-72071-fig3-data2.xlsx]

## Sheet: Sheet1
Fig. 3b	Murine PMNs
90 mg/dl	200 mg/dl	300 mg/dl	400 mg/dl	500 mg/dl
274	447	479	484	387
920	722	887	489	340
713	848	824	1070	460
711	445	718	705	391
484	801	1071	579	400
572	599	1075	224	464
	200 mg/dl				300 mg/dl				400 mg/dl				500 mg/dl
	vs.				vs.				vs.				vs.
	90 mg/dl				90 mg/dl				90 mg/dl				90 mg/dl
Unpaired t test				Unpaired t test				Unpaired t test				Unpaired t test
P value	0.7916			P value	0.1062			P value	0.8917			P value	0.0513
P value summary	ns			P value summary	ns			P value summary	ns			P value summary	ns
Significantly different (P < 0.05)?	No			Significantly different (P < 0.05)?	No			Significantly different (P < 0.05)?	No			Significantly different (P < 0.05)?	No
One- or two-tailed P value?	Two-tailed			One- or two-tailed P value?	Two-tailed			One- or two-tailed P value?	Two-tailed			One- or two-tailed P value?	Two-tailed
t, df	t=0.2714, df=10			t, df	t=1.776, df=10			t, df	t=0.1397, df=10			t, df	t=2.213, df=10
How big is the difference?				How big is the difference?				How big is the difference?				How big is the difference?
Mean of column A	612.3			Mean of column A	612.3			Mean of column A	612.3			Mean of column A	612.3
Mean of column B	643.7			Mean of column C	842.3			Mean of column D	591.8			Mean of column E	407
Difference between means (B - A) ± SEM	31.33 ± 115.5			Difference between means (C - A) ± SEM	230.0 ± 129.5			Difference between means (D - A) ± SEM	-20.50 ± 146.8			Difference between means (E - A) ± SEM	-205.3 ± 92.80
95% confidence interval	-225.9 to 288.6			95% confidence interval	-58.60 to 518.6			95% confidence interval	-347.5 to 306.5			95% confidence interval	-412.1 to 1.434
R squared (eta squared)	0.007312			R squared (eta squared)	0.2397			R squared (eta squared)	0.001947			R squared (eta squared)	0.3287
F test to compare variances				F test to compare variances				F test to compare variances				F test to compare variances
F, DFn, Dfd	1.617, 5, 5			F, DFn, Dfd	1.037, 5, 5			F, DFn, Dfd	1.615, 5, 5			F, DFn, Dfd	21.96, 5, 5
P value	0.6107			P value	0.9692			P value	0.6116			P value	0.0041
P value summary	ns			P value summary	ns			P value summary	ns			P value summary	**
Significantly different (P < 0.05)?	No			Significantly different (P < 0.05)?	No			Significantly different (P < 0.05)?	No			Significantly different (P < 0.05)?	Yes
Data analyzed				Data analyzed				Data analyzed				Data analyzed
Sample size, column A	6			Sample size, column A	6			Sample size, column A	6			Sample size, column A	6
Sample size, column B	6			Sample size, column C	6			Sample size, column D	6			Sample size, column E	6
