# Supplementary material for: Overriding impaired FPR chemotaxis signaling in diabetic neutrophil stimulates infection control in murine diabetic wound
Source: eLife. 2022 Feb 3;11:e72071. doi: 10.7554/eLife.72071 (PMC8846594; doi:10.7554/eLife.72071)
Supplement: Figure 3—source data 4. [file elife-72071-fig3-data4.xlsx]

## Sheet: Sheet1
Fig. 3d	Western blot-CCR1
90mg/dl	300mg/dl
1	1.53917
1	1.1564
1	1.27415
1	1.31892
1	1.16573
Table Analyzed	CCR1 - 90 vs 300 glucose
	300mg/dl
	vs.
	90mg/dl
Wilcoxon matched-pairs signed rank test
P value	0.0625
Exact or approximate P value?	Exact
P value summary	ns
Significantly different (P < 0.05)?	No
One- or two-tailed P value?	Two-tailed
Sum of positive, negative ranks	15.00 , 0.000
Sum of signed ranks (W)	15
Number of pairs	5
Number of ties (ignored)	0
Median of differences
Median	0.2742
How effective was the pairing?
rs (Spearman)	Horizontal line
P value (one tailed)
P value summary
Was the pairing significantly effective?
