# Supplementary material for: Overriding impaired FPR chemotaxis signaling in diabetic neutrophil stimulates infection control in murine diabetic wound
Source: eLife. 2022 Feb 3;11:e72071. doi: 10.7554/eLife.72071 (PMC8846594; doi:10.7554/eLife.72071)
Supplement: Figure 3—source data 5. [file elife-72071-fig3-data5.xlsx]

## Sheet: Sheet1
Fig. 3e	RT-PCR-Ccr1
90 mg/dL	300 mg/dL
0.977064	1.25959
1.02294	1.05703
1.34641	1.37282
1.65359	1.44831
	300-1h
	vs.
	90-1h
Unpaired t test
P value	0.8539
P value summary	ns
Significantly different (P < 0.05)?	No
One- or two-tailed P value?	Two-tailed
t, df	t=0.1922, df=6
How big is the difference?
Mean of column A	1.25
Mean of column B	1.284
Difference between means (B - A) ± SEM	0.03444 ± 0.1792
95% confidence interval	-0.4040 to 0.4729
R squared (eta squared)	0.006119
F test to compare variances
F, DFn, Dfd	3.428, 3, 3
P value	0.3386
P value summary	ns
Significantly different (P < 0.05)?	No
Data analyzed
Sample size, column A	4
Sample size, column B	4
