# Supplementary material for: Overriding impaired FPR chemotaxis signaling in diabetic neutrophil stimulates infection control in murine diabetic wound
Source: eLife. 2022 Feb 3;11:e72071. doi: 10.7554/eLife.72071 (PMC8846594; doi:10.7554/eLife.72071)
Supplement: Figure 3—source data 6. [file elife-72071-fig3-data6.xlsx]

## Sheet: Sheet1
Fig. 3g-Flow data for CCR1
90 mg/dL	300 mg/dL
121.2	187.3
72.6	140.3
154	165.7
99.6	104.4
	300
	vs.
	90
Paired t test
P value	0.114
P value summary	ns
Significantly different (P < 0.05)?	No
One- or two-tailed P value?	Two-tailed
t, df	t=2.211, df=3
Number of pairs	4
How big is the difference?
Mean of differences (B - A)	37.58
SD of differences	33.98
SEM of differences	16.99
95% confidence interval	-16.50 to 91.65
R squared (partial eta squared)	0.6198
How effective was the pairing?
Correlation coefficient (r)	0.5298
P value (one tailed)	0.2351
P value summary	ns
Was the pairing significantly effective?	No
