# Supplementary material for: Overriding impaired FPR chemotaxis signaling in diabetic neutrophil stimulates infection control in murine diabetic wound
Source: eLife. 2022 Feb 3;11:e72071. doi: 10.7554/eLife.72071 (PMC8846594; doi:10.7554/eLife.72071)
Supplement: Figure 3—source data 8. [file elife-72071-fig3-data8.xlsx]

## Sheet: Sheet1
Fig. 3i	Western blot-CCR1
C57B	db/db
1	0.858467
1	0.92471
1	0.940434
1	1.07211
	db/db
	vs.
	C57B
Unpaired t test
P value	0.2971
P value summary	ns
Significantly different (P < 0.05)?	No
One- or two-tailed P value?	Two-tailed
t, df	t=1.142, df=6
How big is the difference?
Mean of column A	1
Mean of column B	0.9489
Difference between means (B - A) ± SEM	-0.05107 ± 0.04474
95% confidence interval	-0.1605 to 0.05840
R squared (eta squared)	0.1784
F test to compare variances
F, DFn, Dfd	Infinity, 3, 3
P value	<0.0001
P value summary	****
Significantly different (P < 0.05)?	Yes
Data analyzed
Sample size, column A	4
Sample size, column B	4
