# Supplementary material for: Overriding impaired FPR chemotaxis signaling in diabetic neutrophil stimulates infection control in murine diabetic wound
Source: eLife. 2022 Feb 3;11:e72071. doi: 10.7554/eLife.72071 (PMC8846594; doi:10.7554/eLife.72071)
Supplement: Figure 3—source data 9. — Flow cytometery data on CCR1 expression on Neutrophils. [file elife-72071-fig3-data9.xlsx]

## Sheet: Sheet1
Fig. 3j	Flow-CCR1 on Neutrophils
C57B			db/db
1.9	2.49	4.53	3.45	1.01	8.15
	C57B
	vs.
	db/db
Unpaired t test
P value	0.6124
P value summary	ns
Significantly different (P < 0.05)?	No
One- or two-tailed P value?	Two-tailed
t, df	t=0.5487, df=4
How big is the difference?
Mean of column A	4.203
Mean of column B	2.973
Difference between means (B - A) ± SEM	-1.230 ± 2.242
95% confidence interval	-7.454 to 4.994
R squared (eta squared)	0.07
F test to compare variances
F, DFn, Dfd	6.916, 2, 2
P value	0.2527
P value summary	ns
Significantly different (P < 0.05)?	No
Data analyzed
Sample size, column A	3
Sample size, column B	3
