# Supplementary material for: Overriding impaired FPR chemotaxis signaling in diabetic neutrophil stimulates infection control in murine diabetic wound
Source: eLife. 2022 Feb 3;11:e72071. doi: 10.7554/eLife.72071 (PMC8846594; doi:10.7554/eLife.72071)
Supplement: Figure 4—figure supplement 1—source data 1. [file elife-72071-fig4-figsupp1-data1.xlsx]

## Sheet: Sheet1
Figure 4-figure supplement 1b
Netrophils fraction
IgG	aLy6G
21.7	0.041
10.9	1
11.4	0.25
8.67	0.074
	aLy6G
	vs.
	IgG
Unpaired t test
P value	0.0046
P value summary	**
Significantly different (P < 0.05)?	Yes
One- or two-tailed P value?	Two-tailed
t, df	t=4.402, df=6
How big is the difference?
Mean of column A	13.17
Mean of column B	0.3413
Difference between means (B - A) ± SEM	-12.83 ± 2.914
95% confidence interval	-19.96 to -5.696
R squared (eta squared)	0.7635
F test to compare variances
F, DFn, Dfd	167.8, 3, 3
P value	0.0015
P value summary	**
Significantly different (P < 0.05)?	Yes
Data analyzed
Sample size, column A	4
Sample size, column B	4
