# Supplementary material for: Overriding impaired FPR chemotaxis signaling in diabetic neutrophil stimulates infection control in murine diabetic wound
Source: eLife. 2022 Feb 3;11:e72071. doi: 10.7554/eLife.72071 (PMC8846594; doi:10.7554/eLife.72071)
Supplement: Figure 4—source data 1. [file elife-72071-fig4-data1.xlsx]

## Sheet: Sheet1
Fig. 4a-RT-PCR-Ccl3
90mg/dl	300mg/dl
1.08179	0.512316
0.918207	0.754806
1.0118	0.429514
0.988198	0.441101
0.992994	0.259385
1.00701	0.140843
Column B	300-1h
vs.	vs.
Column A	90-1h
Unpaired t test
P value	<0.0001
P value summary	****
Significantly different (P < 0.05)?	Yes
One- or two-tailed P value?	Two-tailed
t, df	t=6.470, df=10
How big is the difference?
Mean of column A	1
Mean of column B	0.423
Difference between means (B - A) ± SEM	-0.5770 ± 0.08918
95% confidence interval	-0.7757 to -0.3783
R squared (eta squared)	0.8072
F test to compare variances
F, DFn, Dfd	16.34, 5, 5
P value	0.0081
P value summary	**
Significantly different (P < 0.05)?	Yes
Data analyzed
Sample size, column A	6
Sample size, column B	6
