# Supplementary material for: Overriding impaired FPR chemotaxis signaling in diabetic neutrophil stimulates infection control in murine diabetic wound
Source: eLife. 2022 Feb 3;11:e72071. doi: 10.7554/eLife.72071 (PMC8846594; doi:10.7554/eLife.72071)
Supplement: Figure 4—source data 3. [file elife-72071-fig4-data3.xlsx]

## Sheet: Sheet1
Fig. 4c	Western blot CCL3
	C57	db/db
	1	0.023947
	1	0.160483
	1	0.0141665
	1	0.0101531
	dbdb_Day 1
	vs.
	C57_Day 1
Unpaired t test
P value	<0.0001
P value summary	****
Significantly different (P < 0.05)?	Yes
One- or two-tailed P value?	Two-tailed
t, df	t=26.17, df=6
How big is the difference?
Mean of column A	1
Mean of column B	0.05219
Difference between means (B - A) ± SEM	-0.9478 ± 0.03621
95% confidence interval	-1.036 to -0.8592
R squared (eta squared)	0.9913
F test to compare variances
F, DFn, Dfd	Infinity, 3, 3
P value	<0.0001
P value summary	****
Significantly different (P < 0.05)?	Yes
Data analyzed
Sample size, column A	4
Sample size, column B	4
