# Supplementary material for: Overriding impaired FPR chemotaxis signaling in diabetic neutrophil stimulates infection control in murine diabetic wound
Source: eLife. 2022 Feb 3;11:e72071. doi: 10.7554/eLife.72071 (PMC8846594; doi:10.7554/eLife.72071)
Supplement: Figure 4—source data 4. [file elife-72071-fig4-data4.xlsx]

## Sheet: Sheet1
Fig. 4e	Neutrophils counts
	Day 1_PA103+PBS	Day 1 PA103+CCL3
	18	68.6667
	23	72
	9.5	47.3333
	19.25	142.667
Day 1 PA103+CCL3
vs.
Day 1_PA103+PBS
Unpaired t test
P value	0.0207
P value summary	*
Significantly different (P < 0.05)?	Yes
One- or two-tailed P value?	Two-tailed
t, df	t=3.117, df=6
How big is the difference?
Mean of column A	17.44
Mean of column B	82.67
Difference between means (B - A) ± SEM	65.23 ± 20.93
95% confidence interval	14.02 to 116.4
R squared (eta squared)	0.6182
F test to compare variances
F, DFn, Dfd	52.88, 3, 3
P value	0.0085
P value summary	**
Significantly different (P < 0.05)?	Yes
Data analyzed
Sample size, column A	4
Sample size, column B	4
