# Supplementary material for: Overriding impaired FPR chemotaxis signaling in diabetic neutrophil stimulates infection control in murine diabetic wound
Source: eLife. 2022 Feb 3;11:e72071. doi: 10.7554/eLife.72071 (PMC8846594; doi:10.7554/eLife.72071)
Supplement: Figure 4—source data 5. [file elife-72071-fig4-data5.xlsx]

## Sheet: Sheet1
Fig. 4f	Flow-neutrphils
PBS				CCL3
0.125474	0.082768	0.041195	0.033874	7.4091	5.69919	1.3132
	PBS
	vs.
	CCL3
Unpaired t test
P value	0.0263
P value summary	*
Significantly different (P < 0.05)?	Yes
One- or two-tailed P value?	Two-tailed
t, df	t=3.118, df=5
How big is the difference?
Mean of column C	0.07083
Mean of column D	4.807
Difference between means (D - C) ± SEM	4.736 ± 1.519
95% confidence interval	0.8315 to 8.641
R squared (eta squared)	0.6604
F test to compare variances
F, DFn, Dfd	5521, 2, 3
P value	<0.0001
P value summary	****
Significantly different (P < 0.05)?	Yes
Data analyzed
Sample size, column C	4
Sample size, column D	3
