# Supplementary material for: Overriding impaired FPR chemotaxis signaling in diabetic neutrophil stimulates infection control in murine diabetic wound
Source: eLife. 2022 Feb 3;11:e72071. doi: 10.7554/eLife.72071 (PMC8846594; doi:10.7554/eLife.72071)
Supplement: Figure 4—source data 6. [file elife-72071-fig4-data6.xlsx]

## Sheet: Sheet1
Fig. 4g	MPO
	PBS_PA103				CCL3_PA103
Day 1	9.28	10.012	8.306	9.768	18.274	16.274	16.62	15.334
	CCL3_PA103
	vs.
	PBS_PA103
Unpaired t test
P value	<0.0001
P value summary	****
Significantly different (P < 0.05)?	Yes
One- or two-tailed P value?	Two-tailed
t, df	t=10.12, df=6
How big is the difference?
Mean of column A	9.342
Mean of column B	16.63
Difference between means (B - A) ± SEM	7.284 ± 0.7198
95% confidence interval	5.523 to 9.045
R squared (eta squared)	0.9447
F test to compare variances
F, DFn, Dfd	2.641, 3, 3
P value	0.4463
P value summary	ns
Significantly different (P < 0.05)?	No
Data analyzed
