# Supplementary material for: Overriding impaired FPR chemotaxis signaling in diabetic neutrophil stimulates infection control in murine diabetic wound
Source: eLife. 2022 Feb 3;11:e72071. doi: 10.7554/eLife.72071 (PMC8846594; doi:10.7554/eLife.72071)
Supplement: Figure 4—source data 7. [file elife-72071-fig4-data7.xlsx]

## Sheet: Sheet1
Fig. 4h	Bacterial burden
PBS_PA103	CCL3_PA103
72413790	969499
63623790	883028
45520230	667216
82670900	207684
	CCL3_PA103
	vs.
	PBS_PA103
Unpaired t test
P value	0.0002
P value summary	***
Significantly different (P < 0.05)?	Yes
One- or two-tailed P value?	Two-tailed
t, df	t=8.300, df=6
How big is the difference?
Mean of column A	66057178
Mean of column B	681857
Difference between means (B - A) ± SEM	-65375321 ± 7876432
95% confidence interval	-84648255 to -46102386
R squared (eta squared)	0.9199
F test to compare variances
F, DFn, Dfd	2137, 3, 3
P value	<0.0001
P value summary	****
Significantly different (P < 0.05)?	Yes
Data analyzed
Sample size, column A	4
Sample size, column B	4
