# Supplementary material for: Overriding impaired FPR chemotaxis signaling in diabetic neutrophil stimulates infection control in murine diabetic wound
Source: eLife. 2022 Feb 3;11:e72071. doi: 10.7554/eLife.72071 (PMC8846594; doi:10.7554/eLife.72071)
Supplement: Figure 4—source data 8. [file elife-72071-fig4-data8.xlsx]

## Sheet: Sheet1
Fig. 4i	MPO
	PBS				CCL3
IgG	9.923	9.111	9.852		25.84	24.91	19.5
Ly6G	3.054	5.447	1.747		6.276	5.759	6.236
	PBS_PA103				Ly6G+PA103+CCL3					Ly6G+PA103				Ly6G+PA103+CCL3
	vs.				vs.					vs.				vs.
	CCL3_PA103				Ly6G+PA103					PBS_PA103				CCL3_PA103
Unpaired t test				Unpaired t test					Unpaired t test				Unpaired t test
P value	0.0023			P value	0.0712				P value	0.0051			P value	0.0009
P value summary	**			P value summary	ns				P value summary	**			P value summary	***
Significantly different (P < 0.05)?	Yes			Significantly different (P < 0.05)?	No				Significantly different (P < 0.05)?	Yes			Significantly different (P < 0.05)?	Yes
One- or two-tailed P value?	Two-tailed			One- or two-tailed P value?	Two-tailed				One- or two-tailed P value?	Two-tailed			One- or two-tailed P value?	Two-tailed
t, df	t=6.916, df=4			t, df	t=2.440, df=4				t, df	t=5.577, df=4			t, df	t=8.735, df=4
How big is the difference?				How big is the difference?					How big is the difference?				How big is the difference?
Mean of column A	9.629			Mean of column C	3.416				Mean of column A	9.629			Mean of column B	23.42
Mean of column B	23.42			Mean of column D	6.09				Mean of column C	3.416			Mean of column D	6.09
Difference between means (A - B) ± SEM	-13.79 ± 1.994			Difference between means (D - C) ± SEM	2.674 ± 1.096				Difference between means (C - A) ± SEM	-6.213 ± 1.114			Difference between means (D - B) ± SEM	-17.33 ± 1.984
95% confidence interval	-19.32 to -8.253			95% confidence interval	-0.3686 to 5.717				95% confidence interval	-9.306 to -3.120			95% confidence interval	-22.83 to -11.82
R squared (eta squared)	0.9228			R squared (eta squared)	0.5982				R squared (eta squared)	0.886			R squared (eta squared)	0.9502
F test to compare variances				F test to compare variances					F test to compare variances				F test to compare variances
F, DFn, Dfd	57.96, 2, 2			F, DFn, Dfd	42.55, 2, 2				F, DFn, Dfd	17.41, 2, 2			F, DFn, Dfd	141.7, 2, 2
P value	0.0339			P value	0.0459				P value	0.1086			P value	0.014
P value summary	*			P value summary	*				P value summary	ns			P value summary	*
Significantly different (P < 0.05)?	Yes			Significantly different (P < 0.05)?	Yes				Significantly different (P < 0.05)?	No			Significantly different (P < 0.05)?	Yes
Data analyzed				Data analyzed					Data analyzed				Data analyzed
Sample size, column A	3			Sample size, column C	3				Sample size, column A	3			Sample size, column B	3
Sample size, column B	3			Sample size, column D	3				Sample size, column C	3			Sample size, column D	3
