# Supplementary material for: Overriding impaired FPR chemotaxis signaling in diabetic neutrophil stimulates infection control in murine diabetic wound
Source: eLife. 2022 Feb 3;11:e72071. doi: 10.7554/eLife.72071 (PMC8846594; doi:10.7554/eLife.72071)
Supplement: Figure 4—source data 9. [file elife-72071-fig4-data9.xlsx]

## Sheet: Sheet1
Fig. 4j	Bacterial burden
	PBS_PA103	CCL3_PA103	Ly6G+PA103	Ly6G+PA103+CCL3
	1331915	12500	19047620	81838570
	2008032	1230	179784900	109434000
	421473	140	56668080	102654900
	3035280	25000	186082600	65098470
			162935300	1374389
	PBS_PA103				One-way analysis of variance
	vs				P value	0.0044
	CCL3_PA103				P value summary	**
					Are means signif. different? (P < 0.05)	Yes
Unpaired t test					Number of groups	4
P value	0.0015				F	6.915
P value summary	**				R squared	0.5971
Are means signif. different? (P < 0.05)	Yes
One- or two-tailed P value?	Two-tailed				ANOVA Table	SS	df	MS
t, df	t=5.495 df=6				Treatment (between columns)	4.662e+16	3	1.554e+16
					Residual (within columns)	3.146e+16	14	2247000000000000
How big is the difference?					Total	7.808e+16	17
Mean ± SEM of column A	260100 ± 45190 N=4
Mean ± SEM of column B	9718 ± 5810 N=4				Newman-Keuls Multiple Comparison Test	Mean Diff.	q	Significant? P < 0.05?	Summary
Difference between means	250400 ± 45570				CCL3_PA103 vs Ly6G+PA103	-120900000	5.376	Yes	**
95% confidence interval	138900 to 361900				CCL3_PA103 vs Ly6G+PA103+CCL3	-72070000	3.205	No	ns
R squared	0.8342				CCL3_PA103 vs PBS_PA103	-1689000	---	No	ns
					PBS_PA103 vs Ly6G+PA103	-119200000	5.301	Yes	**
F test to compare variances					PBS_PA103 vs Ly6G+PA103+CCL3	-70380000	---	No	ns
F,DFn, Dfd	60.51, 3, 3				Ly6G+PA103+CCL3 vs Ly6G+PA103	-48820000	2.303	No	ns
P value	0.007
P value summary	**
Are variances significantly different?	Yes
