# Supplementary material for: Overriding impaired FPR chemotaxis signaling in diabetic neutrophil stimulates infection control in murine diabetic wound
Source: eLife. 2022 Feb 3;11:e72071. doi: 10.7554/eLife.72071 (PMC8846594; doi:10.7554/eLife.72071)
Supplement: Figure 5—source data 1. [file elife-72071-fig5-data1.xlsx]

## Sheet: Sheet1
Fig. 5a	Il1b
	PBS_PA103				CCL3_PA103
Day 1	536.4	507.4	515.6	501.2	2845	3496	2101
Day 3	1390.4	1691.8	1536.8	1837.8	2318	2547	1392	2114
Day 6	3016	2976	2726	3548	2035	1866	2413	1901
Day 10	2600	3826	3982	3958	551.2	551.2	574	1057
Table Analyzed	IL1_days
Two-way ANOVA
Source of Variation	% of total variation	P value
Interaction	46.98	< 0.0001
Column Factor	0.81	0.0743
Row Factor	43.77	< 0.0001
Source of Variation	P value summary	Significant?
Interaction	***	Yes
Column Factor	ns	No
Row Factor	***	Yes
Source of Variation	Df	Sum-of-squares	Mean square	F
Interaction	4	27580000	6895000	49.58
Column Factor	1	478100	478100	3.438
Row Factor	4	25700000	6424000	46.19
Residual	28	3894000	139100
Number of missing values	2
Bonferroni posttests
PBS_PA103 vs CCL3_PA103
Row Factor	PBS_PA103	CCL3_PA103	Difference	95% CI of diff.
Day 0	70.32	84.69	14.37	-772.7 to 801.4
Day 1	515.2	2814	2299	1512 to 3086
Day 3	1614	2093	478.6	-250.1 to 1207
Day 6	3067	2054	-1013	-1741 to -284.1
Day 10	3592	683.4	-2908	-3637 to -2179
Row Factor	Difference	t	P value	Summary
Day 0	14.37	0.05045	P > 0.05	ns
Day 1	2299	8.071	P<0.001	***
Day 3	478.6	1.815	P > 0.05	ns
Day 6	-1013	3.841	P<0.01	**
Day 10	-2908	11.03	P<0.001	***
