# Supplementary material for: Overriding impaired FPR chemotaxis signaling in diabetic neutrophil stimulates infection control in murine diabetic wound
Source: eLife. 2022 Feb 3;11:e72071. doi: 10.7554/eLife.72071 (PMC8846594; doi:10.7554/eLife.72071)
Supplement: Figure 5—source data 2. [file elife-72071-fig5-data2.xlsx]

## Sheet: Sheet1
	Fig. 5b	TNFa
		PBS_PA103				CCL3_PA103
	Day 1	66.4	71.48	91.52	68.8	184.8	220.1	241.2	255.35
	Day 3	312.9	182	209.7	200.9	338.8	409.3	285.8
	Day 6	269.1	191.2	250.9	281.6	282.55	220.9	276.35	235.7
	Day 10	421	583.2	588.4		103.55	84.2	98.5	69.75
		Day1_TNF				Day3_TNF				Day6_TNF				Day10_TNF
		PBS_PA103				PBS_PA103				PBS_PA103				PBS_PA103
		vs.				vs.				vs.				vs.
		CCL3_PA103				CCL3_PA103				CCL3_PA103				CCL3_PA103
	Unpaired t test				Unpaired t test				Unpaired t test				Unpaired t test
	P value	<0.0001			P value	0.0497			P value	0.8286			P value	0.0002
	P value summary	****			P value summary	*			P value summary	ns			P value summary	***
	Significantly different (P < 0.05)?	Yes			Significantly different (P < 0.05)?	Yes			Significantly different (P < 0.05)?	No			Significantly different (P < 0.05)?	Yes
	One- or two-tailed P value?	Two-tailed			One- or two-tailed P value?	Two-tailed			One- or two-tailed P value?	Two-tailed			One- or two-tailed P value?	Two-tailed
	t, df	t=9.207, df=6			t, df	t=2.576, df=5			t, df	t=0.2262, df=6			t, df	t=9.431, df=5
	How big is the difference?				How big is the difference?				How big is the difference?				How big is the difference?
	Mean of column A	74.55			Mean of column A	226.4			Mean of column A	248.2			Mean of column A	530.9
	Mean of column B	225.4			Mean of column B	344.6			Mean of column B	253.9			Mean of column B	89
	Difference between means (A - B) ± SEM	-150.8 ± 16.38			Difference between means (A - B) ± SEM	-118.3 ± 45.90			Difference between means (A - B) ± SEM	-5.675 ± 25.09			Difference between means (A - B) ± SEM	441.9 ± 46.85
	95% confidence interval	-190.9 to -110.7			95% confidence interval	-236.3 to -0.2636			95% confidence interval	-67.07 to 55.72			95% confidence interval	321.4 to 562.3
	R squared (eta squared)	0.9339			R squared (eta squared)	0.5704			R squared (eta squared)	0.008455			R squared (eta squared)	0.9468
	F test to compare variances				F test to compare variances				F test to compare variances				F test to compare variances
	F, DFn, Dfd	7.113, 3, 3			F, DFn, Dfd	1.109, 2, 3			F, DFn, Dfd	1.752, 3, 3			F, DFn, Dfd	39.08, 2, 3
	P value	0.1414			P value	0.8718			P value	0.6565			P value	0.0142
	P value summary	ns			P value summary	ns			P value summary	ns			P value summary	*
	Significantly different (P < 0.05)?	No			Significantly different (P < 0.05)?	No			Significantly different (P < 0.05)?	No			Significantly different (P < 0.05)?	Yes
	Data analyzed				Data analyzed				Data analyzed				Data analyzed
	Sample size, column A	4			Sample size, column A	4			Sample size, column A	4			Sample size, column A	3
	Sample size, column B	4			Sample size, column B	3			Sample size, column B	4			Sample size, column B	4
