# Supplementary material for: Overriding impaired FPR chemotaxis signaling in diabetic neutrophil stimulates infection control in murine diabetic wound
Source: eLife. 2022 Feb 3;11:e72071. doi: 10.7554/eLife.72071 (PMC8846594; doi:10.7554/eLife.72071)
Supplement: Figure 5—source data 3. [file elife-72071-fig5-data3.xlsx]

## Sheet: Sheet1
Fig. 5d	Nutrophil counts
	Day 1_PA103+PBS	Day 1 PA103+CCL3	Day 3_PA103+PBS	Day 3 PA103+CCL3	Day 6_PA103+PBS	Day 6 PA103+CCL3	Day 10_PA103+PBS	Day 10_PA103+CCL3
	18	68.6667	27.755	105.75	87.25	38.25	140.667	10
	23	72	31.25	92.5	103	24.25	93.6667	14.5
	9.5	47.3333	24	110.5	124	26.75	164.333	23.5
	19.25	142.667	25.5	89	115.75	25.5	212.5	10
	Day 1 PA103+CCL3					Day 3 PA103+CCL3					Day 6 PA103+CCL3					Day 10_PA103+CCL3					Day 3_PA103+PBS					Day 6_PA103+PBS					Day 10_PA103+PBS					Day 3 PA103+CCL3					Day 6 PA103+CCL3					Day 10_PA103+CCL3
	vs.					vs.					vs.					vs.					vs.					vs.					vs.					vs.					vs.					vs.
	Day 1_PA103+PBS					Day 3_PA103+PBS					Day 6_PA103+PBS					Day 10_PA103+PBS					Day 1_PA103+PBS					Day 1_PA103+PBS					Day 1_PA103+PBS					Day 1 PA103+CCL3					Day 1 PA103+CCL3					Day 1 PA103+CCL3
	Unpaired t test					Unpaired t test					Unpaired t test					Unpaired t test					Unpaired t test					Unpaired t test					Unpaired t test					Unpaired t test					Unpaired t test					Unpaired t test
	P value	0.0207				P value	<0.0001				P value	<0.0001				P value	0.0015				P value	0.0248				P value	<0.0001				P value	0.0016				P value	0.4623				P value	0.0422				P value	0.0175
	P value summary	*				P value summary	****				P value summary	****				P value summary	**				P value summary	*				P value summary	****				P value summary	**				P value summary	ns				P value summary	*				P value summary	*
	Significantly different (P < 0.05)?	Yes				Significantly different (P < 0.05)?	Yes				Significantly different (P < 0.05)?	Yes				Significantly different (P < 0.05)?	Yes				Significantly different (P < 0.05)?	Yes				Significantly different (P < 0.05)?	Yes				Significantly different (P < 0.05)?	Yes				Significantly different (P < 0.05)?	No				Significantly different (P < 0.05)?	Yes				Significantly different (P < 0.05)?	Yes
	One- or two-tailed P value?	Two-tailed				One- or two-tailed P value?	Two-tailed				One- or two-tailed P value?	Two-tailed				One- or two-tailed P value?	Two-tailed				One- or two-tailed P value?	Two-tailed				One- or two-tailed P value?	Two-tailed				One- or two-tailed P value?	Two-tailed				One- or two-tailed P value?	Two-tailed				One- or two-tailed P value?	Two-tailed				One- or two-tailed P value?	Two-tailed
	t, df	t=3.117, df=6				t, df	t=13.41, df=6				t, df	t=9.122, df=6				t, df	t=5.546, df=6				t, df	t=2.974, df=6				t, df	t=10.59, df=6				t, df	t=5.436, df=6				t, df	t=0.7850, df=6				t, df	t=2.573, df=6				t, df	t=3.250, df=6
	How big is the difference?					How big is the difference?					How big is the difference?					How big is the difference?					How big is the difference?					How big is the difference?					How big is the difference?					How big is the difference?					How big is the difference?					How big is the difference?
	Mean of column A	17.44				Mean of column C	27.13				Mean of column E	107.5				Mean of column G	152.8				Mean of column A	17.44				Mean of column A	17.44				Mean of column A	17.44				Mean of column B	82.67				Mean of column B	82.67				Mean of column B	82.67
	Mean of column B	82.67				Mean of column D	99.44				Mean of column F	28.69				Mean of column H	14.5				Mean of column C	27.13				Mean of column E	107.5				Mean of column G	152.8				Mean of column D	99.44				Mean of column F	28.69				Mean of column H	14.5
	Difference between means (B - A) ± SEM	65.23 ± 20.93				Difference between means (D - C) ± SEM	72.31 ± 5.394				Difference between means (F - E) ± SEM	-78.81 ± 8.639				Difference between means (H - G) ± SEM	-138.3 ± 24.94				Difference between means (C - A) ± SEM	9.689 ± 3.258				Difference between means (E - A) ± SEM	90.06 ± 8.506				Difference between means (G - A) ± SEM	135.4 ± 24.90				Difference between means (D - B) ± SEM	16.77 ± 21.37				Difference between means (F - B) ± SEM	-53.98 ± 20.98				Difference between means (H - B) ± SEM	-68.17 ± 20.98
	95% confidence interval	14.02 to 116.4				95% confidence interval	59.11 to 85.51				95% confidence interval	-99.95 to -57.67				95% confidence interval	-199.3 to -77.27				95% confidence interval	1.717 to 17.66				95% confidence interval	69.25 to 110.9				95% confidence interval	74.43 to 196.3				95% confidence interval	-35.51 to 69.05				95% confidence interval	-105.3 to -2.636				95% confidence interval	-119.5 to -16.84
	R squared (eta squared)	0.6182				R squared (eta squared)	0.9677				R squared (eta squared)	0.9327				R squared (eta squared)	0.8367				R squared (eta squared)	0.5958				R squared (eta squared)	0.9492				R squared (eta squared)	0.8312				R squared (eta squared)	0.09313				R squared (eta squared)	0.5245				R squared (eta squared)	0.6377
	F test to compare variances					F test to compare variances					F test to compare variances					F test to compare variances					F test to compare variances					F test to compare variances					F test to compare variances					F test to compare variances					F test to compare variances					F test to compare variances
	F, DFn, Dfd	52.88, 3, 3				F, DFn, Dfd	10.71, 3, 3				F, DFn, Dfd	6.163, 3, 3				F, DFn, Dfd	60.42, 3, 3				F, DFn, Dfd	3.271, 3, 3				F, DFn, Dfd	7.900, 3, 3				F, DFn, Dfd	75.26, 3, 3				F, DFn, Dfd	16.16, 3, 3				F, DFn, Dfd	41.25, 3, 3				F, DFn, Dfd	42.45, 3, 3
	P value	0.0085				P value	0.0825				P value	0.1695				P value	0.007				P value	0.3564				P value	0.1235				P value	0.0051				P value	0.0469				P value	0.0123				P value	0.0118
	P value summary	**				P value summary	ns				P value summary	ns				P value summary	**				P value summary	ns				P value summary	ns				P value summary	**				P value summary	*				P value summary	*				P value summary	*
	Significantly different (P < 0.05)?	Yes				Significantly different (P < 0.05)?	No				Significantly different (P < 0.05)?	No				Significantly different (P < 0.05)?	Yes				Significantly different (P < 0.05)?	No				Significantly different (P < 0.05)?	No				Significantly different (P < 0.05)?	Yes				Significantly different (P < 0.05)?	Yes				Significantly different (P < 0.05)?	Yes				Significantly different (P < 0.05)?	Yes
	Data analyzed					Data analyzed					Data analyzed					Data analyzed					Data analyzed					Data analyzed					Data analyzed					Data analyzed					Data analyzed					Data analyzed
	Sample size, column A	4				Sample size, column C	4				Sample size, column E	4				Sample size, column G	4				Sample size, column A	4				Sample size, column A	4				Sample size, column A	4				Sample size, column B	4				Sample size, column B	4				Sample size, column B	4
	Sample size, column B	4				Sample size, column D	4				Sample size, column F	4				Sample size, column H	4				Sample size, column C	4				Sample size, column E	4				Sample size, column G	4				Sample size, column D	4				Sample size, column F	4				Sample size, column H	4
