# Supplementary material for: Overriding impaired FPR chemotaxis signaling in diabetic neutrophil stimulates infection control in murine diabetic wound
Source: eLife. 2022 Feb 3;11:e72071. doi: 10.7554/eLife.72071 (PMC8846594; doi:10.7554/eLife.72071)
Supplement: Figure 6—source data 1. [file elife-72071-fig6-data1.xlsx]

## Sheet: Sheet1
Fig. 6b	Wound size
	Day 0_PA103	Day 0_PA103+CCL3	Day 1_PA103	Day 1_PA103+CCL3	Day 3_PA103	Day 3_PA103+CCL3	Day 6_PA103	Day 6_PA103+CCL3	Day 10_Pa103	Day 10_PA103+CCL3
	105.93	105.93	130.185	88.5237	120.167	94.8618	116.647	102.6	143.312	59.0542
	95.4512	95.4512	105.269	90.416	110.244	102.966	130.595	101.47	152.655	77.8879
	94.4118	94.4118	102.424	96.0981	107.943	95.9194	162.5	102.668	146.01	85.4791
	104.207	104.207	114.924	92.6382	102.537	104.864	132.594	93.5602	164.675	83.8067
	Column B	Day 0_PA103+CCL3					Day 1_PA103+CCL3					Day 3_PA103+CCL3					Day 6_PA103+CCL3					Day 10_PA103+CCL3
	vs.	vs.					vs.					vs.					vs.					vs.
	Column A	Day 0_PA103					Day 1_PA103					Day 3_PA103					Day 6_PA103					Day 10_Pa103
	Unpaired t test					Unpaired t test					Unpaired t test					Unpaired t test					Unpaired t test
	P value	>0.9999				P value	0.0166				P value	0.0553				P value	0.0115				P value	<0.0001
	P value summary	ns				P value summary	*				P value summary	ns				P value summary	*				P value summary	****
	Significantly different (P < 0.05)?	No				Significantly different (P < 0.05)?	Yes				Significantly different (P < 0.05)?	No				Significantly different (P < 0.05)?	Yes				Significantly different (P < 0.05)?	Yes
	One- or two-tailed P value?	Two-tailed				One- or two-tailed P value?	Two-tailed				One- or two-tailed P value?	Two-tailed				One- or two-tailed P value?	Two-tailed				One- or two-tailed P value?	Two-tailed
	t, df	t=0.000, df=6				t, df	t=3.290, df=6				t, df	t=2.372, df=6				t, df	t=3.589, df=6				t, df	t=9.749, df=6
	How big is the difference?					How big is the difference?					How big is the difference?					How big is the difference?					How big is the difference?
	Mean of column A	100				Mean of column C	113.2				Mean of column E	110.2				Mean of column G	135.6				Mean of column I	151.7
	Mean of column B	100				Mean of column D	91.92				Mean of column F	99.65				Mean of column H	100.1				Mean of column J	76.56
	Difference between means (B - A) ± SEM	0.000 ± 4.179				Difference between means (D - C) ± SEM	-21.28 ± 6.470				Difference between means (F - E) ± SEM	-10.57 ± 4.455				Difference between means (H - G) ± SEM	-35.51 ± 9.893				Difference between means (J - I) ± SEM	-75.11 ± 7.704
	95% confidence interval	-10.23 to 10.23				95% confidence interval	-37.11 to -5.451				95% confidence interval	-21.47 to 0.3317				95% confidence interval	-59.72 to -11.30				95% confidence interval	-93.96 to -56.25
	R squared (eta squared)	0				R squared (eta squared)	0.6433				R squared (eta squared)	0.484				R squared (eta squared)	0.6823				R squared (eta squared)	0.9406
	F test to compare variances					F test to compare variances					F test to compare variances					F test to compare variances					F test to compare variances
	F, DFn, Dfd	1.000, 3, 3				F, DFn, Dfd	14.81, 3, 3				F, DFn, Dfd	2.175, 3, 3				F, DFn, Dfd	19.43, 3, 3				F, DFn, Dfd	1.619, 3, 3
	P value	>0.9999				P value	0.053				P value	0.5399				P value	0.0362				P value	0.702
	P value summary	ns				P value summary	ns				P value summary	ns				P value summary	*				P value summary	ns
	Significantly different (P < 0.05)?	No				Significantly different (P < 0.05)?	No				Significantly different (P < 0.05)?	No				Significantly different (P < 0.05)?	Yes				Significantly different (P < 0.05)?	No
	Data analyzed					Data analyzed					Data analyzed					Data analyzed					Data analyzed
	Sample size, column A	4				Sample size, column C	4				Sample size, column E	4				Sample size, column G	4				Sample size, column I	4
	Sample size, column B	4				Sample size, column D	4				Sample size, column F	4				Sample size, column H	4				Sample size, column J	4
