# Supplementary material for: Overriding impaired FPR chemotaxis signaling in diabetic neutrophil stimulates infection control in murine diabetic wound
Source: eLife. 2022 Feb 3;11:e72071. doi: 10.7554/eLife.72071 (PMC8846594; doi:10.7554/eLife.72071)
Supplement: Figure 6—source data 2. [file elife-72071-fig6-data2.xlsx]

## Sheet: Sheet1
Fig. 6d	Wound closure
Day 1_PA103	Day 1_PA103+CCL3	Day 3_PA103	Day 3_PA103+CCL3	Day 6_PA103	Day 6_PA103+CCL3	Day 10_Pa103	Day 10_PA103+CCL3
581.761	717.989	681.985	618.024	798.885	576.888	812.543	295.537
520.384	675.193	774.685	537.12	681.692	553.565	858.055	465.335
612.245	548.57	447.635	536.474	830.43	662.672	801.361	198.344
		781.094	601.422	624.219	506.184	813.387	304.292
	Day 1_PA103+CCL3					Day 3_PA103+CCL3					Day 6_PA103+CCL3					Day 10_PA103+CCL3
	vs.					vs.					vs.					vs.
	Day 1_PA103					Day 3_PA103					Day 6_PA103					Day 10_Pa103
Unpaired t test					Unpaired t test					Unpaired t test					Unpaired t test
P value	0.62				P value	0.2704				P value	0.0349				P value	0.0001
P value summary	ns				P value summary	ns				P value summary	*				P value summary	***
Significantly different (P < 0.05)?	No				Significantly different (P < 0.05)?	No				Significantly different (P < 0.05)?	Yes				Significantly different (P < 0.05)?	Yes
One- or two-tailed P value?	Two-tailed				One- or two-tailed P value?	Two-tailed				One- or two-tailed P value?	Two-tailed				One- or two-tailed P value?	Two-tailed
t, df	t=0.5225, df=6				t, df	t=1.214, df=6				t, df	t=2.714, df=6				t, df	t=8.914, df=6
How big is the difference?					How big is the difference?					How big is the difference?					How big is the difference?
Mean of column A	650.6				Mean of column C	671.3				Mean of column E	733.8				Mean of column G	821.3
Mean of column B	706.5				Mean of column D	573.3				Mean of column F	574.8				Mean of column H	315.9
Difference between means (B - A) ± SEM	55.87 ± 106.9				Difference between means (D - C) ± SEM	-98.09 ± 80.80				Difference between means (F - E) ± SEM	-159.0 ± 58.58				Difference between means (H - G) ± SEM	-505.5 ± 56.71
95% confidence interval	-205.8 to 317.5				95% confidence interval	-295.8 to 99.62				95% confidence interval	-302.3 to -15.64				95% confidence interval	-644.2 to -366.7
R squared (eta squared)	0.04352				R squared (eta squared)	0.1972				R squared (eta squared)	0.5511				R squared (eta squared)	0.9298
F test to compare variances					F test to compare variances					F test to compare variances					F test to compare variances
F, DFn, Dfd	1.381, 3, 3				F, DFn, Dfd	13.36, 3, 3				F, DFn, Dfd	2.196, 3, 3				F, DFn, Dfd	19.44, 3, 3
P value	0.7973				P value	0.0611				P value	0.5349				P value	0.0362
P value summary	ns				P value summary	ns				P value summary	ns				P value summary	*
Significantly different (P < 0.05)?	No				Significantly different (P < 0.05)?	No				Significantly different (P < 0.05)?	No				Significantly different (P < 0.05)?	Yes
Data analyzed					Data analyzed					Data analyzed					Data analyzed
Sample size, column A	4				Sample size, column C	4				Sample size, column E	4				Sample size, column G	4
Sample size, column B	4				Sample size, column D	4				Sample size, column F	4				Sample size, column H	4
