# Supplementary material for: Overriding impaired FPR chemotaxis signaling in diabetic neutrophil stimulates infection control in murine diabetic wound
Source: eLife. 2022 Feb 3;11:e72071. doi: 10.7554/eLife.72071 (PMC8846594; doi:10.7554/eLife.72071)
Supplement: Figure 6—source data 3. [file elife-72071-fig6-data3.xlsx]

## Sheet: Sheet1
Fig. 6f
Vimentin								a-SMA					Collagen							Elastin
	PBS		CCL3					PBS		CCL3				PBS		CCL3				PBS		CCL3
	%Area		%Area					%Area		%Area				%Area		%Area				%Area		%Area
M1	4.06	N1	7.118				M1	0.41	N1	1.288			M1	14.791	N1	13.807			M1	14.137	N1	20.307
	5.574		14.009					0.198		0.209				13.683		16.473				17.911		16.989
	5.451		13.467					0.056		0.806				14.053		13.229				11.739		18.219
	3.449		12.276					0.422		1.11				12.825		12.052				19.545		13.267
	1.233		10.125					0.26		0.288						7.649				21.857		15.29
	2.165		12.759										M2	11.97		15.968				1.476
	2.82													13.692		17.468				3.907
	3.171													12.317		10.482				3.69
							M2	0.77	N2	0.986				13.249						9.002
M2	1.925	N2	11.504					0.706		3.89
	6.812		5.078					0.471		4.84
	5.043		8.177					0.974		5.55			M3	9.509	N2	20.286			M2	6.979	N2	11.496
	2.844		8.117					0.792		4.345				10.249		17.578				13.625		16.904
	2.325		10.021											11.157		13.4				15.825		22.279
	2.728		10.603											7.731		14.477				15.398		21.551
	0.513													11.1		19.859				18.295
	0.27													12.521		13.681				8.977
														10.185						4.361
M3	3.686	N3	8.482				M3	0.474	N3	9.717				13.426						1.682
	3.148		5.099					0.199		7.885				6.264
	4.253		10.877					0.199		6.168				12.239
	3.954		3.919					0.084		6.389				7.89	N3	22.177			M3	8.412	N3	10.102
	5.654		7.219					0.247		4.219				21.27		19.196				16.736		17.981
	5.593		3.454					0.159		3.323						19.797				8.347		12.41
			6.909					0.088								22.841				13.443		11.333
			15.244																	8.66
																				6.093
													M4	8.555	N4	29.596				7.11
M4	5.708	N4	4.144				M4	0.165	N4	3.942				9.682		20.532				4.958
	3.877		5.351					0.061		5.951				10.431		28.571				8.826
	3.309		7.17					0.167		2.132				10.455		36.471				2.895
	3.254		4.027					0.204		1.329				3.269		17.247				2.816
	6.157		3.585					0.143		0.912				3.322						5.913
	5.447		3.848							1.64				12.91						5.103
	4.691		3.138											11.713
														7.858
	PBS								PBS										M4	5.809	N4	11.244
	vs.								vs.						PA103+CCL3_Day1					7.186		8.353
	CCL3								CCL3						vs.					16.108		20.582
															PA103_Day1					17.393		9.087
Unpaired t test								Unpaired t test												13.519		31.062
P value	<0.0001							P value	<0.0001					Unpaired t test						17.071		22.628
P value summary	****							P value summary	****					P value	<0.0001					7.986
Significantly different (P < 0.05)?	Yes							Significantly different (P < 0.05)?	Yes					P value summary	****					3.459
One- or two-tailed P value?	Two-tailed							One- or two-tailed P value?	Two-tailed					Significantly different (P < 0.05)?	Yes					4.803
t, df	t=5.601, df=54							t, df	t=5.548, df=42					One- or two-tailed P value?	Two-tailed					12.795
														t, df	t=5.212, df=50					4.5
How big is the difference?								How big is the difference?												1.121
Mean of column A	3.763							Mean of column A	0.3295					How big is the difference?
Mean of column B	7.99							Mean of column B	3.496					Mean of column A	10.98
Difference between means (A - B) ± SEM	-4.227 ± 0.7547							Difference between means (A - B) ± SEM	-3.167 ± 0.5708					Mean of column B	18.38					PBS
95% confidence interval	-5.740 to -2.714							95% confidence interval	-4.319 to -2.015					Difference between means (B - A) ± SEM	7.408 ± 1.421					vs.
R squared (eta squared)	0.3675							R squared (eta squared)	0.4229					95% confidence interval	4.553 to 10.26					CCL3
														R squared (eta squared)	0.3521
F test to compare variances								F test to compare variances											Unpaired t test
F, DFn, Dfd	4.797, 26, 28							F, DFn, Dfd	100.5, 21, 21					F test to compare variances					P value	<0.0001
P value	<0.0001							P value	<0.0001					F, DFn, Dfd	3.415, 22, 28				P value summary	****
P value summary	****							P value summary	****					P value	0.0026				Significantly different (P < 0.05)?	Yes
Significantly different (P < 0.05)?	Yes							Significantly different (P < 0.05)?	Yes					P value summary	**				One- or two-tailed P value?	Two-tailed
														Significantly different (P < 0.05)?	Yes				t, df	t=4.312, df=59
Data analyzed								Data analyzed
Sample size, column A	29							Sample size, column A	22					Data analyzed					How big is the difference?
Sample size, column B	27							Sample size, column B	22					Sample size, column A	29				Mean of column A	9.511
														Sample size, column B	23				Mean of column B	16.37
																			Difference between means (A - B) ± SEM	-6.862 ± 1.591
																			95% confidence interval	-10.05 to -3.678
																			R squared (eta squared)	0.2396
																			F test to compare variances
																			F, DFn, Dfd	1.046, 18, 41
																			P value	0.8691
																			P value summary	ns
																			Significantly different (P < 0.05)?	No
																			Data analyzed
																			Sample size, column A	42
																			Sample size, column B	19
