# Supplementary material for: Overriding impaired FPR chemotaxis signaling in diabetic neutrophil stimulates infection control in murine diabetic wound
Source: eLife journal article supplement (doi:10.7554/elife.72071), 2022-02-03
Supplement: supp [file elife_poa_e72071_Figure_1_source_data_1.xlsx]

## Sheet: Fig. 1b
Fig. 1b	Neutrophils counts
Day 1_C57	Day 1 db/db	Day 3 C57	Day 3 db/db	Day 6 C57	Day 6 db/db	Day 10 C57	Day 10 db/db
3143.81	161.221	4633.35	406.558	1051.44	3329.57	560.769	5923.12
3173.95	266.365	5867.05	616.846	1037.42	3883.32	1037.42	6455.85
3708.09	231.317	5257.21	343.471	1184.62	4114.64	785.077	4430.07
2331.86	245.336	5993.22	287.394	1268.74	2313.17	862.182	2243.08
Table Analyzed
Column B	Day 1 db/db			Column D	Day 3 db/db			Column F	Day 6 db/db			Column H	Day 10 db/db			Column C	Day 3 C57			Column E	Day 6 C57			Column G	Day 10 C57			Column D	Day 3 db/db			Column F	Day 6 db/db			Column H	Day 10 db/db
vs.	vs.			vs.	vs.			vs.	vs.			vs.	vs.			vs.	vs.			vs.	vs.			vs.	vs.			vs.	vs.			vs.	vs.			vs.	vs.
Column A	Day 1_C57			Column C	Day 3 C57			Column E	Day 6 C57			Column G	Day 10 C57			Column A	Day 1_C57			Column A	Day 1_C57			Column A	Day 1_C57			Column B	Day 1 db/db			Column B	Day 1 db/db			Column B	Day 1 db/db
Unpaired t test				Unpaired t test				Unpaired t test				Unpaired t test				Unpaired t test				Unpaired t test				Unpaired t test				Unpaired t test				Unpaired t test				Unpaired t test
P value	<0.0001			P value	<0.0001			P value	0.0014			P value	0.0059			P value	0.0014			P value	0.0005			P value	0.0003			P value	0.0476			P value	0.0002			P value	0.003
P value summary	****			P value summary	****			P value summary	**			P value summary	**			P value summary	**			P value summary	***			P value summary	***			P value summary	*			P value summary	***			P value summary	**
Significantly different (P < 0.05)?	Yes			Significantly different (P < 0.05)?	Yes			Significantly different (P < 0.05)?	Yes			Significantly different (P < 0.05)?	Yes			Significantly different (P < 0.05)?	Yes			Significantly different (P < 0.05)?	Yes			Significantly different (P < 0.05)?	Yes			Significantly different (P < 0.05)?	Yes			Significantly different (P < 0.05)?	Yes			Significantly different (P < 0.05)?	Yes
One- or two-tailed P value?	Two-tailed			One- or two-tailed P value?	Two-tailed			One- or two-tailed P value?	Two-tailed			One- or two-tailed P value?	Two-tailed			One- or two-tailed P value?	Two-tailed			One- or two-tailed P value?	Two-tailed			One- or two-tailed P value?	Two-tailed			One- or two-tailed P value?	Two-tailed			One- or two-tailed P value?	Two-tailed			One- or two-tailed P value?	Two-tailed
t, df	t=10.06, df=6			t, df	t=15.66, df=6			t, df	t=5.618, df=6			t, df	t=4.167, df=6			t, df	t=5.562, df=6			t, df	t=6.756, df=6			t, df	t=7.580, df=6			t, df	t=2.483, df=6			t, df	t=7.927, df=6			t, df	t=4.809, df=6
How big is the difference?				How big is the difference?				How big is the difference?				How big is the difference?				How big is the difference?				How big is the difference?				How big is the difference?				How big is the difference?				How big is the difference?				How big is the difference?
Mean of column A	3089			Mean of column C	5438			Mean of column E	1136			Mean of column G	811.4			Mean of column A	3089			Mean of column A	3089			Mean of column A	3089			Mean of column B	226.1			Mean of column B	226.1			Mean of column B	226.1
Mean of column B	226.1			Mean of column D	413.6			Mean of column F	3410			Mean of column H	4763			Mean of column C	5438			Mean of column E	1136			Mean of column G	811.4			Mean of column D	413.6			Mean of column F	3410			Mean of column H	4763
Difference between means (B - A) ± SEM	-2863 ± 284.7			Difference between means (D - C) ± SEM	-5024 ± 320.8			Difference between means (F - E) ± SEM	2275 ± 404.9			Difference between means (H - G) ± SEM	3952 ± 948.2			Difference between means (C - A) ± SEM	2348 ± 422.2			Difference between means (E - A) ± SEM	-1954 ± 289.2			Difference between means (G - A) ± SEM	-2278 ± 300.5			Difference between means (D - B) ± SEM	187.5 ± 75.52			Difference between means (F - B) ± SEM	3184 ± 401.7			Difference between means (H - B) ± SEM	4537 ± 943.3
95% confidence interval	-3560 to -2167			95% confidence interval	-5809 to -4239			95% confidence interval	1284 to 3265			95% confidence interval	1631 to 6272			95% confidence interval	1315 to 3381			95% confidence interval	-2662 to -1246			95% confidence interval	-3013 to -1543			95% confidence interval	2.726 to 372.3			95% confidence interval	2201 to 4167			95% confidence interval	2229 to 6845
R squared (eta squared)	0.944			R squared (eta squared)	0.9761			R squared (eta squared)	0.8403			R squared (eta squared)	0.7432			R squared (eta squared)	0.8375			R squared (eta squared)	0.8838			R squared (eta squared)	0.9054			R squared (eta squared)	0.5068			R squared (eta squared)	0.9128			R squared (eta squared)	0.794
F test to compare variances				F test to compare variances				F test to compare variances				F test to compare variances				F test to compare variances				F test to compare variances				F test to compare variances				F test to compare variances				F test to compare variances				F test to compare variances
F, DFn, Dfd	155.2, 3, 3			F, DFn, Dfd	18.85, 3, 3			F, DFn, Dfd	52.37, 3, 3			F, DFn, Dfd	91.08, 3, 3			F, DFn, Dfd	1.213, 3, 3			F, DFn, Dfd	26.23, 3, 3			F, DFn, Dfd	8.250, 3, 3			F, DFn, Dfd	9.988, 3, 3			F, DFn, Dfd	309.9, 3, 3			F, DFn, Dfd	1714, 3, 3
P value	0.0017			P value	0.0378			P value	0.0087			P value	0.0038			P value	0.8777			P value	0.0236			P value	0.1167			P value	0.0906			P value	0.0006			P value	<0.0001
P value summary	**			P value summary	*			P value summary	**			P value summary	**			P value summary	ns			P value summary	*			P value summary	ns			P value summary	ns			P value summary	***			P value summary	****
Significantly different (P < 0.05)?	Yes			Significantly different (P < 0.05)?	Yes			Significantly different (P < 0.05)?	Yes			Significantly different (P < 0.05)?	Yes			Significantly different (P < 0.05)?	No			Significantly different (P < 0.05)?	Yes			Significantly different (P < 0.05)?	No			Significantly different (P < 0.05)?	No			Significantly different (P < 0.05)?	Yes			Significantly different (P < 0.05)?	Yes
Data analyzed				Data analyzed				Data analyzed				Data analyzed				Data analyzed				Data analyzed				Data analyzed				Data analyzed				Data analyzed				Data analyzed
Sample size, column A	4			Sample size, column C	4			Sample size, column E	4			Sample size, column G	4			Sample size, column A	4			Sample size, column A	4			Sample size, column A	4			Sample size, column B	4			Sample size, column B	4			Sample size, column B	4
Sample size, column B	4			Sample size, column D	4			Sample size, column F	4			Sample size, column H	4			Sample size, column C	4			Sample size, column E	4			Sample size, column G	4			Sample size, column D	4			Sample size, column F	4			Sample size, column H	4
