# Supplementary material for: Overriding impaired FPR chemotaxis signaling in diabetic neutrophil stimulates infection control in murine diabetic wound
Source: eLife journal article supplement (doi:10.7554/elife.72071), 2022-02-03
Supplement: supp [file elife_poa_e72071_Figure_4_source_data_4.xlsx]

## Sheet: Sheet1
Fig. 4e	Neutrophils counts
	Day 1_PA103+PBS	Day 1 PA103+CCL3
	504.692	1925.31
	644.884	2018.77
	266.365	1327.15
	539.74	4000.15
	Day 1 PA103+CCL3
	vs.
	Day 1_PA103+PBS
Unpaired t test
P value	0.0207
P value summary	*
Significantly different (P < 0.05)?	Yes
One- or two-tailed P value?	Two-tailed
t, df	t=3.117, df=6
How big is the difference?
Mean of column A	488.9
Mean of column B	2318
Difference between means (B - A) ± SEM	1829 ± 586.8
95% confidence interval	393.1 to 3265
R squared (eta squared)	0.6182
F test to compare variances
F, DFn, Dfd	52.88, 3, 3
P value	0.0085
P value summary	**
Significantly different (P < 0.05)?	Yes
Data analyzed
Sample size, column A	4
Sample size, column B	4
