# Supplementary material for: Overriding impaired FPR chemotaxis signaling in diabetic neutrophil stimulates infection control in murine diabetic wound
Source: eLife journal article supplement (doi:10.7554/elife.72071), 2022-02-03
Supplement: supp [file elife_poa_e72071_Figure_5_source_data_3.xlsx]

## Sheet: Sheet1
Fig. 5d	Nutrophil counts
	Day 1_PA103+PBS	Day 1 PA103+CCL3	Day 3_PA103+PBS	Day 3 PA103+CCL3	Day 6_PA103+PBS	Day 6 PA103+CCL3	Day 10_PA103+PBS	Day 10_PA103+CCL3
	504.692	1925.31	778.207	2965.07	2446.36	1072.47	3944.07	280.385
	644.884	2018.77	876.202	2593.56	2887.96	679.932	2626.27	406.558
	266.365	1327.15	672.923	3098.25	3476.77	750.029	4607.65	658.904
	539.74	4000.15	714.981	2495.42	3245.45	714.981	5958.17	280.385
		Day 1 PA103+CCL3					Day 3 PA103+CCL3					Day 6 PA103+CCL3					Day 10_PA103+CCL3					Day 3_PA103+PBS					Day 6_PA103+PBS					Day 10_PA103+PBS					Day 3 PA103+CCL3					Day 6 PA103+CCL3					Day 10_PA103+CCL3
		vs.					vs.					vs.					vs.					vs.					vs.					vs.					vs.					vs.					vs.
		Day 1_PA103+PBS					Day 3_PA103+PBS					Day 6_PA103+PBS					Day 10_PA103+PBS					Day 1_PA103+PBS					Day 1_PA103+PBS					Day 1_PA103+PBS					Day 1 PA103+CCL3					Day 1 PA103+CCL3					Day 1 PA103+CCL3
	Unpaired t test					Unpaired t test					Unpaired t test					Unpaired t test					Unpaired t test					Unpaired t test					Unpaired t test					Unpaired t test					Unpaired t test					Unpaired t test
	P value	0.0207				P value	<0.0001				P value	<0.0001				P value	0.0015				P value	0.0248				P value	<0.0001				P value	0.0016				P value	0.4623				P value	0.0422				P value	0.0175
	P value summary	*				P value summary	****				P value summary	****				P value summary	**				P value summary	*				P value summary	****				P value summary	**				P value summary	ns				P value summary	*				P value summary	*
	Significantly different (P < 0.05)?	Yes				Significantly different (P < 0.05)?	Yes				Significantly different (P < 0.05)?	Yes				Significantly different (P < 0.05)?	Yes				Significantly different (P < 0.05)?	Yes				Significantly different (P < 0.05)?	Yes				Significantly different (P < 0.05)?	Yes				Significantly different (P < 0.05)?	No				Significantly different (P < 0.05)?	Yes				Significantly different (P < 0.05)?	Yes
	One- or two-tailed P value?	Two-tailed				One- or two-tailed P value?	Two-tailed				One- or two-tailed P value?	Two-tailed				One- or two-tailed P value?	Two-tailed				One- or two-tailed P value?	Two-tailed				One- or two-tailed P value?	Two-tailed				One- or two-tailed P value?	Two-tailed				One- or two-tailed P value?	Two-tailed				One- or two-tailed P value?	Two-tailed				One- or two-tailed P value?	Two-tailed
	t, df	t=3.117, df=6				t, df	t=13.41, df=6				t, df	t=9.122, df=6				t, df	t=5.546, df=6				t, df	t=2.974, df=6				t, df	t=10.59, df=6				t, df	t=5.436, df=6				t, df	t=0.7850, df=6				t, df	t=2.573, df=6				t, df	t=3.250, df=6
	How big is the difference?					How big is the difference?					How big is the difference?					How big is the difference?					How big is the difference?					How big is the difference?					How big is the difference?					How big is the difference?					How big is the difference?					How big is the difference?
	Mean of column A	488.9				Mean of column C	760.6				Mean of column E	3014				Mean of column G	4284				Mean of column A	488.9				Mean of column A	488.9				Mean of column A	488.9				Mean of column B	2318				Mean of column B	2318				Mean of column B	2318
	Mean of column B	2318				Mean of column D	2788				Mean of column F	804.4				Mean of column H	406.6				Mean of column C	760.6				Mean of column E	3014				Mean of column G	4284				Mean of column D	2788				Mean of column F	804.4				Mean of column H	406.6
	Difference between means (B - A) ± SEM	1829 ± 586.8				Difference between means (D - C) ± SEM	2027 ± 151.2				Difference between means (F - E) ± SEM	-2210 ± 242.2				Difference between means (H - G) ± SEM	-3877 ± 699.2				Difference between means (C - A) ± SEM	271.7 ± 91.35				Difference between means (E - A) ± SEM	2525 ± 238.5				Difference between means (G - A) ± SEM	3795 ± 698.1				Difference between means (D - B) ± SEM	470.2 ± 599.0				Difference between means (F - B) ± SEM	-1513 ± 588.3				Difference between means (H - B) ± SEM	-1911 ± 588.1
	95% confidence interval	393.1 to 3265				95% confidence interval	1657 to 2398				95% confidence interval	-2803 to -1617				95% confidence interval	-5588 to -2167				95% confidence interval	48.14 to 495.2				95% confidence interval	1942 to 3109				95% confidence interval	2087 to 5503				95% confidence interval	-995.6 to 1936				95% confidence interval	-2953 to -73.92				95% confidence interval	-3350 to -472.2
	R squared (eta squared)	0.6182				R squared (eta squared)	0.9677				R squared (eta squared)	0.9327				R squared (eta squared)	0.8367				R squared (eta squared)	0.5958				R squared (eta squared)	0.9492				R squared (eta squared)	0.8312				R squared (eta squared)	0.09313				R squared (eta squared)	0.5245				R squared (eta squared)	0.6377
	F test to compare variances					F test to compare variances					F test to compare variances					F test to compare variances					F test to compare variances					F test to compare variances					F test to compare variances					F test to compare variances					F test to compare variances					F test to compare variances
	F, DFn, Dfd	52.88, 3, 3				F, DFn, Dfd	10.71, 3, 3				F, DFn, Dfd	6.163, 3, 3				F, DFn, Dfd	60.42, 3, 3				F, DFn, Dfd	3.271, 3, 3				F, DFn, Dfd	7.900, 3, 3				F, DFn, Dfd	75.26, 3, 3				F, DFn, Dfd	16.15, 3, 3				F, DFn, Dfd	41.25, 3, 3				F, DFn, Dfd	42.45, 3, 3
	P value	0.0085				P value	0.0825				P value	0.1695				P value	0.007				P value	0.3564				P value	0.1235				P value	0.0051				P value	0.0469				P value	0.0123				P value	0.0118
	P value summary	**				P value summary	ns				P value summary	ns				P value summary	**				P value summary	ns				P value summary	ns				P value summary	**				P value summary	*				P value summary	*				P value summary	*
	Significantly different (P < 0.05)?	Yes				Significantly different (P < 0.05)?	No				Significantly different (P < 0.05)?	No				Significantly different (P < 0.05)?	Yes				Significantly different (P < 0.05)?	No				Significantly different (P < 0.05)?	No				Significantly different (P < 0.05)?	Yes				Significantly different (P < 0.05)?	Yes				Significantly different (P < 0.05)?	Yes				Significantly different (P < 0.05)?	Yes
	Data analyzed					Data analyzed					Data analyzed					Data analyzed					Data analyzed					Data analyzed					Data analyzed					Data analyzed					Data analyzed					Data analyzed
	Sample size, column A	4				Sample size, column C	4				Sample size, column E	4				Sample size, column G	4				Sample size, column A	4				Sample size, column A	4				Sample size, column A	4				Sample size, column B	4				Sample size, column B	4				Sample size, column B	4
	Sample size, column B	4				Sample size, column D	4				Sample size, column F	4				Sample size, column H	4				Sample size, column C	4				Sample size, column E	4				Sample size, column G	4				Sample size, column D	4				Sample size, column F	4				Sample size, column H	4
