# Supplementary figures and images for: Overriding impaired FPR chemotaxis signaling in diabetic neutrophil stimulates infection control in murine diabetic wound
Source: eLife journal article supplement (doi:10.7554/elife.72071), 2022-02-03

Fig. 2

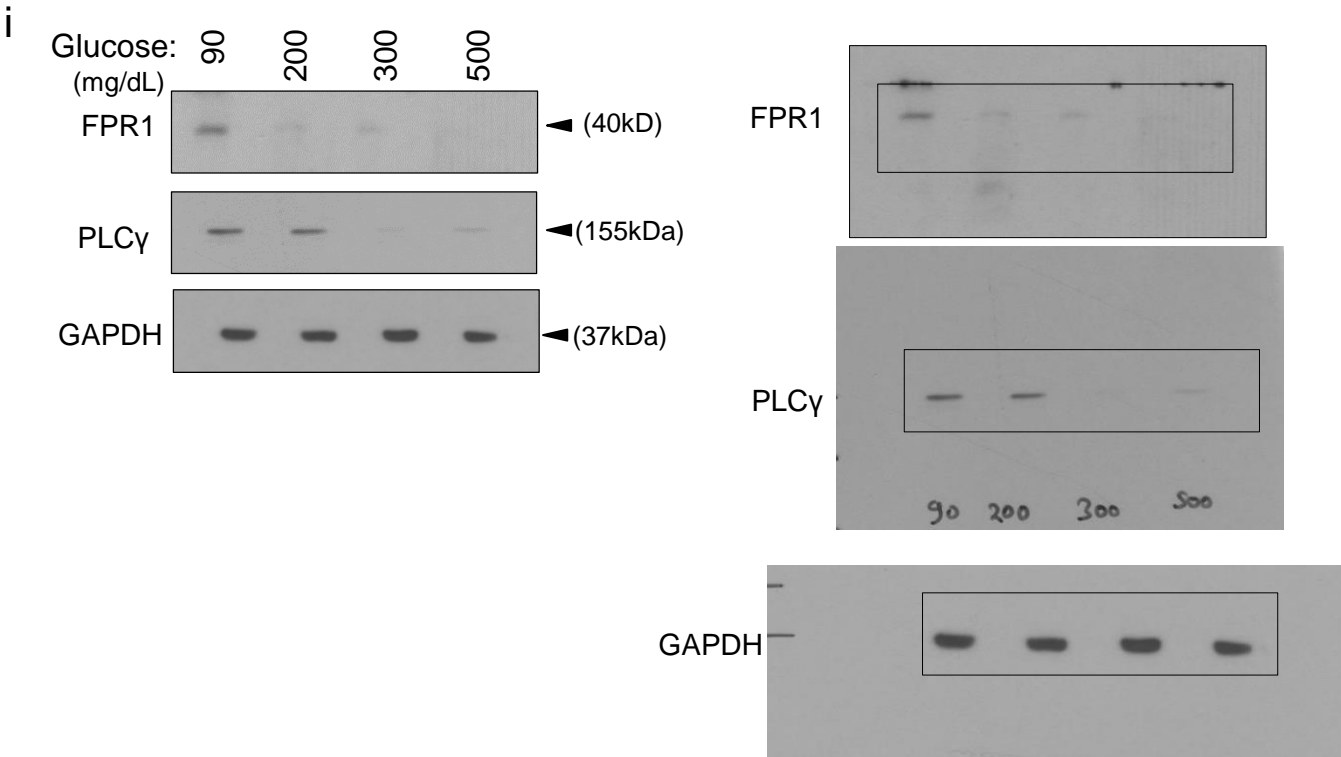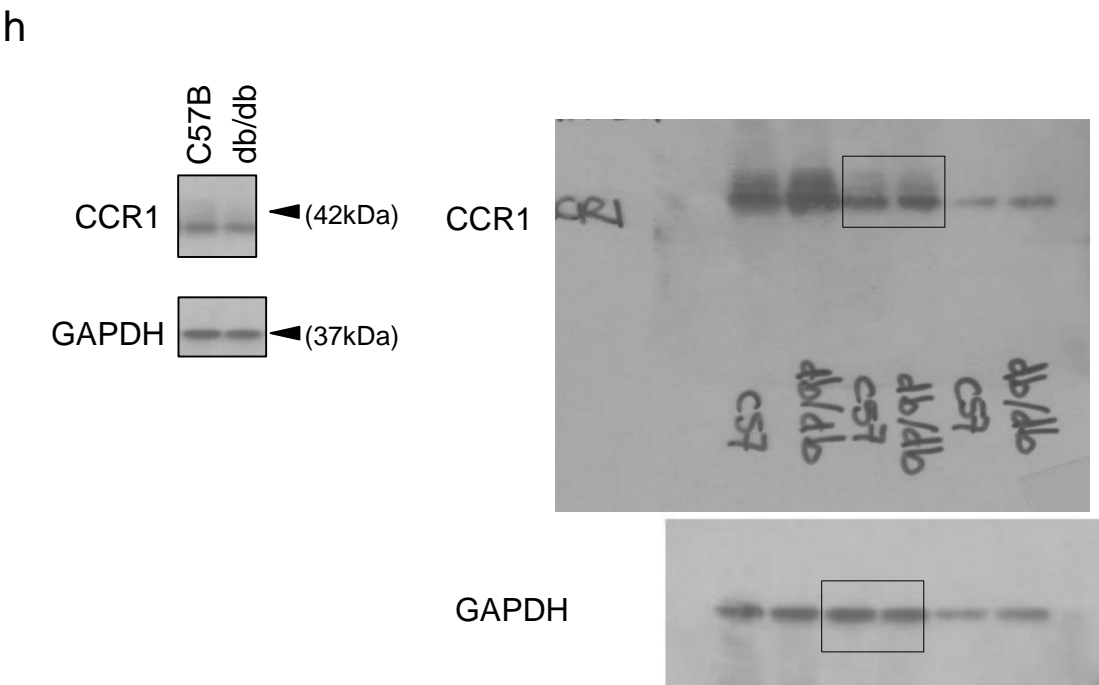

Fig. 3

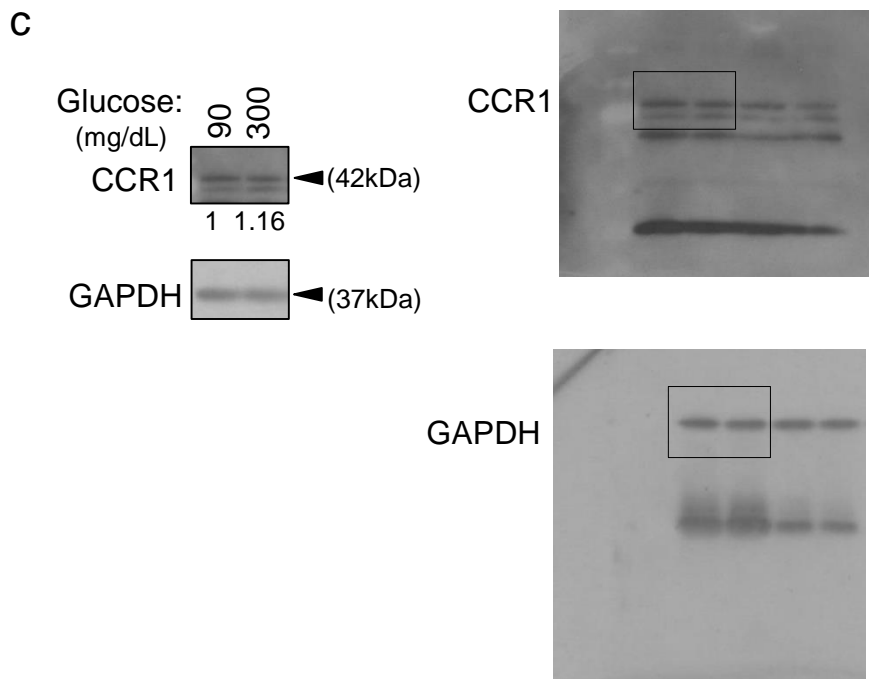

Fig. 4

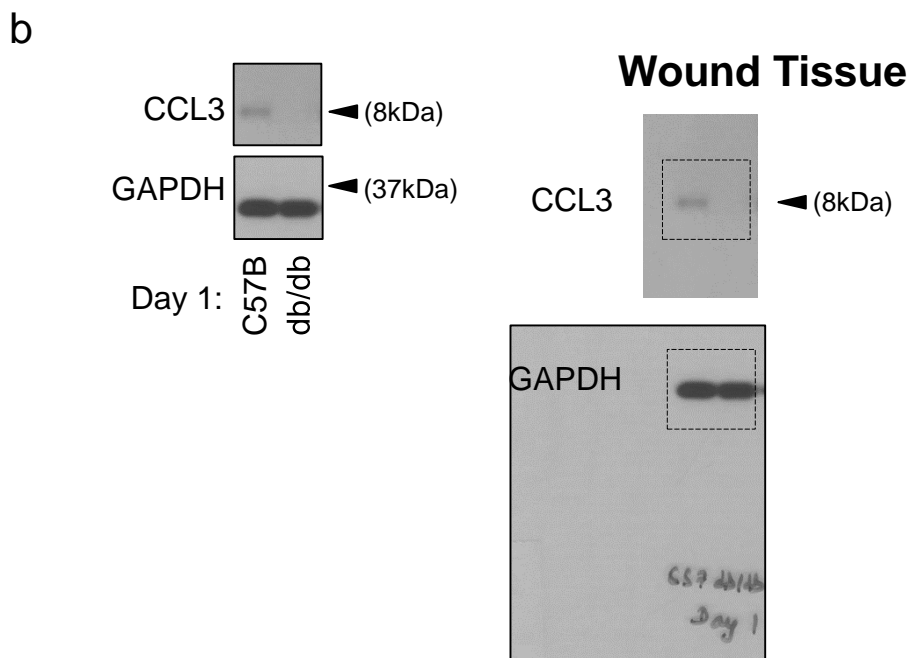

Dashed lines identify cropped area

Supplement: supp [file elife_poa_e72071_Source_data_1.pdf › elife_poa_e72071_Source_data_1.pdf]
